# Supplementary material for: Ultradeep characterisation of translational sequence determinants refutes rare-codon hypothesis and unveils quadruplet base pairing of initiator tRNA and transcript
Source: PubMed Central journal article supplement — Nucleic Acids Res. 2023 Feb 2;51(5):2377–96. doi: 10.1093/nar/gkad040 (PMC10018350; doi:10.1093/nar/gkad040), 2023-02-02
Supplement: gkad040_supplemental_file.pdf [file gkad040_supplemental_file.pdf]

1 **Supplementary information to:**

2

3 **Ultradeep characterisation of translational sequence determinants**  
4 **refutes rare-codon hypothesis and unveils quadruplet base pairing**  
5 **of initiator tRNA and transcript**

6 Simon Höllerer<sup>1</sup> and Markus Jeschek<sup>1,2\*</sup>

7

8 <sup>1</sup>Department of Biosystems Science and Engineering, Swiss Federal Institute of Technology – ETH  
9 Zurich, Basel, CH-4058, Switzerland

10 <sup>2</sup>Institute of Microbiology, Synthetic Microbiology Group, University of Regensburg, Regensburg,  
11 D-93053, Germany

12

13 \*To whom correspondence should be addressed: E-mail: markus.jeschek@ur.de

14 **Supplementary figures**

15

16 All DNA sequences follow the IUPAC nucleotide code; N: A/C/G/T; H: A/C/T; Y: C/T.

17

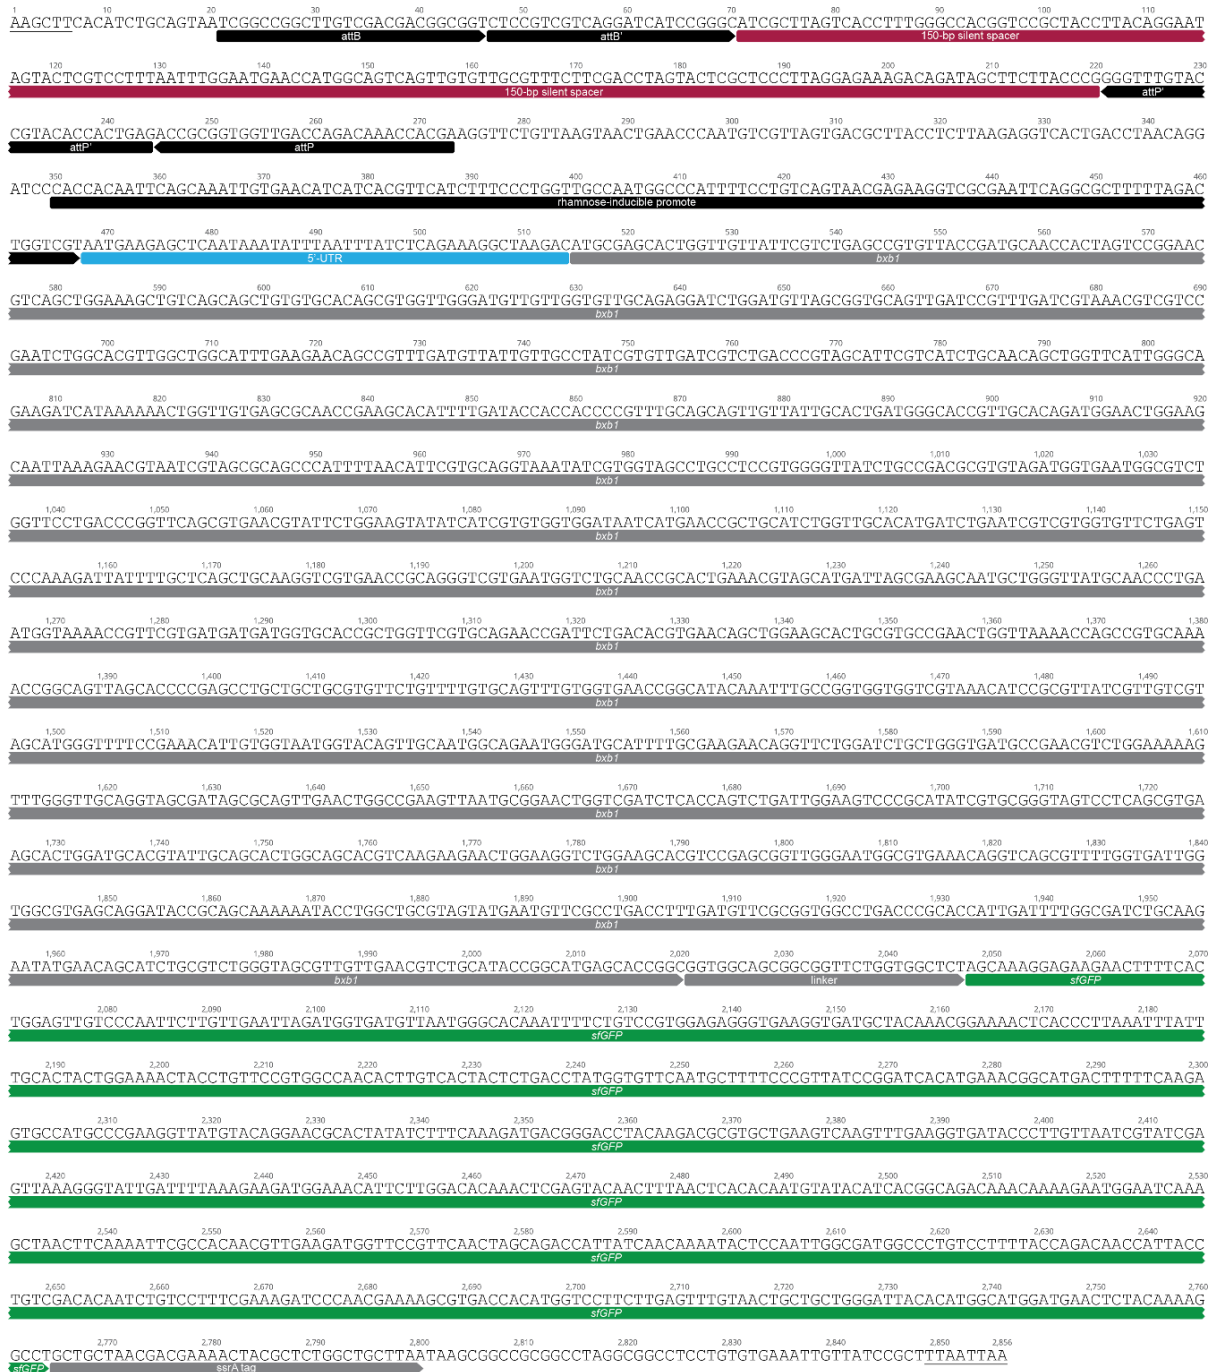

18

19 **Supplementary Figure 1: Graphical representation of pASPIre4.** The displayed sequence  
20 corresponds to the insert between HindIII and PstI restriction sites (underlined) in pSEVA291. srfA:  
21 proteolytic degradation tag. The full sequence is available in text format in **Supplementary Note 2.**



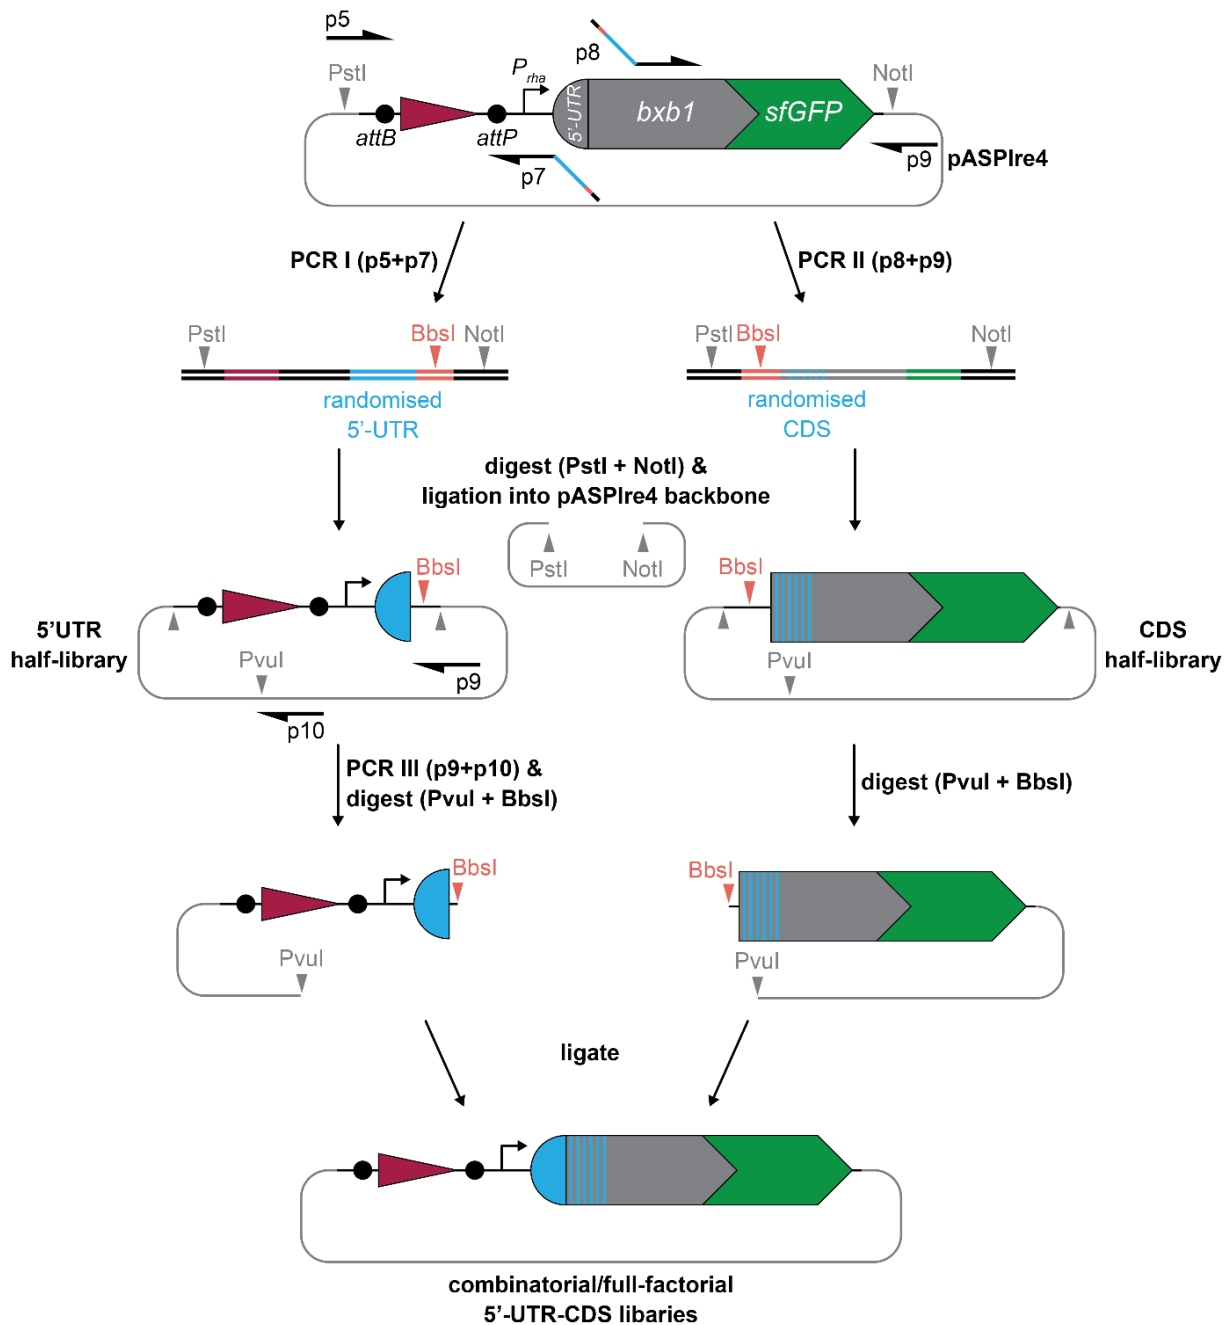

26

27 **Supplementary Figure 3: Cloning scheme for the generation of combinatorial and full-factorial**

28 **5'-UTR-CDS libraries.** Libraries were generated from 5'-UTR and CDS half-libraries as described in

29 the **Methods** section. The 5'-UTR (left) half-library was generated by PCR with primers p5 and p7 with

30 pASPIre4 as template. Primer p7 introduces degeneracy in the 5'-UTR and a BbsI site between the

31 randomised 5'-UTR and the NotI site. The CDS half-library (right) was generated by PCR with primers

32 p8 and p9 on pASPIre4 as template. Primer p8 introduces degeneracy in the CDS and a BbsI site

33 between the CDS and the PstI site. The resulting PCR products were then sub-cloned into pASPIre4

34 to retrieve half libraries. In a second step, 5'-UTR and CDS half-libraries were combined to generate

35 full libraries Lib<sub>comb1</sub>, Lib<sub>comb2</sub> and Lib<sub>fact</sub>. To achieve this, plasmid DNA of the 5'-UTR half-library was

36 PCR-amplified with primers p9 and p10, and the product was digested with BbsI and PvuI and ligated

37 into the backbone prepared from the CDS half-library via digestion with PvuI and BbsI. Note that the

38 BbsI type IIS restriction site enables scarless joining of 5'-UTR and CDS half-libraries using ATGC (start  
39 codon ATG + first downstream base) as sticky ends for ligation.

40

41

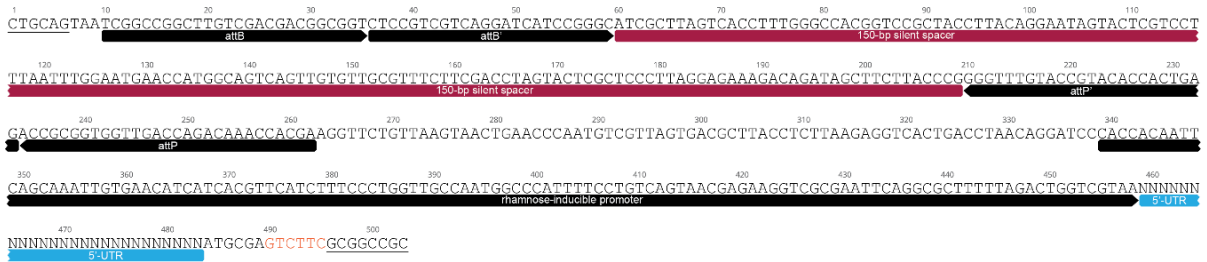

42

43 **Supplementary Figure 4: Graphical representation of 5'-UTR half-libraries.** The displayed  
44 sequence corresponds to the insert between PstI and NotI restriction sites (underlined) in pASPIre4.  
45 The introduced BbsI restriction site (orange) is used for scarless joining of 5'-UTR and CDS half-  
46 libraries. The full sequence is available in text format in **Supplementary Note 4**.

1 10 20 30 40 50 60 70 80 90 100 110  
 CTGCAGGAAGACCCATGCGNGCNCNTNGTNGTNAHCHGNCNTNCNCGNGTACNGAYGNCNACNACTAGTCCGGAACGTGAGCTGGAAAGCTGTGACGACGCTGTGTGCACAGC

120 130 140 150 160 170 180 190 200 210 220  
 GTGGTTGGGATGTTGTTGGTGTGACAGGATCTGGATGTTAGCCGGTGCAGTTGATCCGTTTGTATCGTAAACGTGTCGGAATCTGGCACGTTGGCTGGCATTGAAGAAC

230 240 250 260 270 280 290 300 310 320 330  
 AGCCGTTTGTATGTTATGTTGCCTATCGTGTGATCGTCTGACCCGTAGCATTTCGTATCTGCAACAGCTGGTTCATTGGGCAGAAGATCATAAAAAACGGTGTGTGAGCG

340 350 360 370 380 390 400 410 420 430 440  
 CAACCGAAGCACATTTTGATACCACCACCCCGTTTGCAGCAGTTGTTATTCGACTGATGGGCACCGTTGCACAGATGGAACGGAAAGCAATTAAGAACGTAATCGTAGCG

450 460 470 480 490 500 510 520 530 540 550  
 CAGCCCATTTAACATTCGTGCAGGTAATATCGTGTAGCCTGCCCTCCGTTGGGTTATCTGCCGACCGCTGATAGTGGTGAATGGGCTCTGTTCTGACCCGTTCCAGC

560 570 580 590 600 610 620 630 640 650 660  
 GTGAACGTATTCTGGAAGTATATCATCGTGTGGTGGATAATCATGAACCCGCTGCATCTGGTTGCACATGATCTGAATCGTGTGGTGTCTGAGTCCCAAAGATTATTTTG

670 680 690 700 710 720 730 740 750 760 770  
 CTCAGTGCAGGTCGTGAACCGCAGGGTCGTGAATGGTTCGAACCGCACTGAAACGTAGCATGATAGCGAAGCAATGCTGGTATGCAACCCGTAATGGTAAACCCG

780 790 800 810 820 830 840 850 860 870 880  
 TTCGTGATGATGATGGTGCACCGCTGGTTCGTGCAGAACGATTTCTGACACGTGAACAGCTGGAAGCACTGCGTGCCGAACGTTAAACCCAGCCGTGCAAAACCGGCAG

890 900 910 920 930 940 950 960 970 980 990  
 TTAGCACCCGACCCCTGCTGCTGCGTGTCTGTTTTGTCAGTTTGTGGTGAACCGGCATACAAATTTGCCGGTGGTGGTCTAAACATCCCGCTTATCGTTGCTGATGCA

1,000 1,010 1,020 1,030 1,040 1,050 1,060 1,070 1,080 1,090 1,100 1,110  
 TGGGTTTTCCGAAACATTGTGGTAATGGTACAGTTGCAATGGCAGAAATGGGATGCATTTTGGCAAGAACAGGTTCTGGATCTGCTGGGTGATGCCAACGTCGGAAAAAG

1,120 1,130 1,140 1,150 1,160 1,170 1,180 1,190 1,200 1,210 1,220  
 TTTGGGTTGACGATAGCGATAGCGCAGTTGAACGGCCGAAAGTTAATGCGGAACCTGGTCGATCTCACCAGTCTGATGGAAGTCCCACATATCGTGGGGTAGTCTCAGC

1,230 1,240 1,250 1,260 1,270 1,280 1,290 1,300 1,310 1,320 1,330  
 GTGAAGCACTGGATGCACGTATTGCAGCCTGGCAGCAGCTCAAGAAGAACTGGAAGTCTGGAAGCACGTCGGAGCGGTTGGAAATGGCGTGAACAGGTCACGCTTTTG

1,340 1,350 1,360 1,370 1,380 1,390 1,400 1,410 1,420 1,430 1,440  
 GTGATTGGTGGCGTAGCAGGATACCCGAGCAAAAAATACCTGGCTGCTAGTATGAATGTTGCGCTGACCTTTGATGTTGCGGTTGGCTGACCCCGACCATGATTTTG

1,450 1,460 1,470 1,480 1,490 1,500 1,510 1,520 1,530 1,540 1,550  
 GCGATCTGAAGAATATGAACAGCATCTGCGCTGGGTAGCGTTGTTGAACGCTGCAATACCGGCATGAGCACCGGCGGTTGGCAGCGCGGTTCTGGTGGCTTAGCAAAAG

1,560 1,570 1,580 1,590 1,600 1,610 1,620 1,630 1,640 1,650 1,660  
 GAGAAGAACTTTCACTGGAGTTGCCAAATCTTGTGAATAGATGGTGTGTTAATGGGCACAAAATTTCTGTCCTGGAGAGGGTGAAGGTGATGTACAAACGGAA

1,670 1,680 1,690 1,700 1,710 1,720 1,730 1,740 1,750 1,760 1,770  
 AACTCACCCCTTAATTTATTTGCACTACTGGAAAACCTACCTGTTCCGTGGCCAACTGTGCACTACTGACCTATGGTGTCAATGCTTTTCCCGTTATCCGGATCACA

1,780 1,790 1,800 1,810 1,820 1,830 1,840 1,850 1,860 1,870 1,880  
 TGAACGGCATGACTTTTCAAGAGTGCCTATGCCGAAAGGTTATGTACAGGAACCGCATAATCTTTCAAAGATGACGGGACCTACAAGACGCGTGTGAAGTCAAGTTTG

1,890 1,900 1,910 1,920 1,930 1,940 1,950 1,960 1,970 1,980 1,990  
 AAGGTGATACCCCTTGTAAATCGTATCGAGTTAAAGGGTATTGATTTTAAAGAAGAAGTGAACAACTTCTGGACACAACTCGAGTACAACCTTAACTCACACAATGTATACA

2,000 2,010 2,020 2,030 2,040 2,050 2,060 2,070 2,080 2,090 2,100  
 TCACGGCAGACAAACAAAAGAAATGGAATCAAAGCTAACTCAAATTCGCCAACAGCTGAAGATGGTTCGGTTCAACTAGCAGACCATTAACAACAAAATACTCCAATTG

2,110 2,120 2,130 2,140 2,150 2,160 2,170 2,180 2,190 2,200 2,210 2,220  
 GCGATGGCCCTGTCTTTTACAGACAACCTTACCTGTGCACACAATCTGCTCTTCCGAAAGATCCCAACGAAAGCGTGACCACATGCTCTTCTTGTGACTTTGTAACCTC

2,230 2,240 2,250 2,260 2,270 2,280 2,290 2,300 2,311  
 CTGCTGGGATTACACATGGCATGGATGAACCTACAAAAGGCTGCTGCTAACGACGAAAACCTACGCTCTGGCTGCTTAAATAAGCGGCCGC

Diagrammatic representation of the sequence above:  
 - **Underlined**: PstI and NotI sites (1,450-1,550)  
 - **Orange bar**: BbsI site (1,450-1,550)  
 - **Green bars**: stGFP genes (1,560-1,660, 1,670-1,770, 1,780-1,880, 1,890-1,990, 2,000-2,100, 2,110-2,220)  
 - **Grey bar**: ssrA tag (2,270-2,280)

47

48 **Supplementary Figure 5: Graphical representation of CDS half-libraries.** The displayed sequence  
 49 corresponds to the insert between PstI and NotI restriction sites (underlined) in pASPIre4. The  
 50 introduced BbsI restriction site (orange) is used for scarless joining of 5'-UTR and CDS half-libraries.  
 51 The full sequence in text format is available in **Supplementary Note 5**.

```

1      10      20      30      40      50      60      70      80      90      100     110
GGTACCAAATAACACCCCTGCTTAATTAAGTATGATGAGCCTGGATTTCGGCTCTCACTGAATTTTATGCAAAATAAATGAGTTTTCATTTAATCATCTTTTATCGGAGACAGG

120     130     140     150     160     170     180     190     200     210     220     230
AAGAGTTTAGTGTGTTTTTTGTAAAATAATGCGCTTAAGGGAGAGCAGGAGAAGGCAAAAGTATTCACAAATGAAAGTGAAGTGGATATTCATTCACATGATTAGCAATAAACGT
                                     promoter metY2

240     250     260     270     280     290     300     310     320     330     340
TGACAAATGTGGCGTGGATCAGTATAATGCCIGCAGATTTTACCTCCCGTCTCGGTACACCAAAATCCCAGCAGTATTTGCATTTTACCCAAAACGAGTAGAATTTGCCACGTT
promoter metY2                                     promoter metY1

350     360     370     380     390     400     410     420     430     440     450     460
TCAGGCGGGGGTGGAGCAGCCTGGTAGCTCGTCCGGGCTCATNACCCGAAGGTCGTCGGTTCAAATCCGGCCCCCGCAACCACTTCCCTTAGAGTCCTTTTCAAATATACTGTG
promoter metY1                                     tRNAfMet variant

470     480     490     500     510     520     530     540     550     560     570     580
AAGACTTCGGCCTTCGTAGTGGGATTTGAAAAATCCTTCTGGAAAGTGCTCCAGACCCAGTTGCGGTTATAGGGTTCAGTTATATAAAGCCCGATTTATCGGGGTTTTTTTGTG
                                     terminator

590     600     610     620     630     640     642
ATCTGACTACAGAATAACTGGGCTTTAGGCCCTTTTTTTATGTCCTGGGGTGGGCACTAGT
                                     terminator

```

52  
53  
54  
55  
56  
57  
58  
59

**Supplementary Figure 6: Graphical representation of plasmids for the overexpression of tRNA<sup>fMet</sup> variants.** The displayed sequence corresponds to the native chromosomal locus of *metY* including regulatory sequences. The bold N nucleotide indicates the mutated position 37 (p37) in tRNA<sup>fMet</sup>. The window between KpnI and SpeI restriction sites (underlined) in pSEVA361 is shown. The full sequence is available in text format in **Supplementary Note 6**.

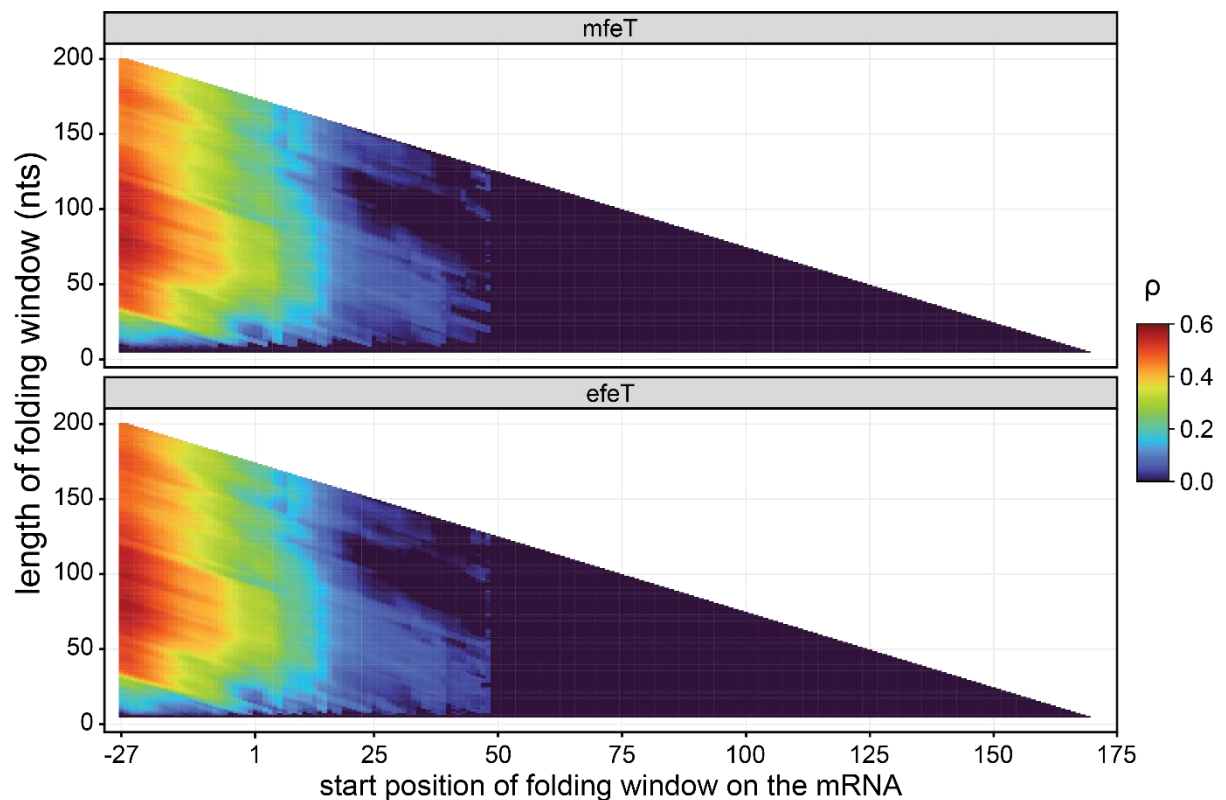

60  
61  
62  
63  
64

**Supplementary Figure 7: Correlation between predicted folding energy and rTR for different mRNA windows.** Folding energies (mfeT and efeT) of all possible mRNA sequence windows with lengths between 5 and 200 bases were predicted using *RNAfold* of the *Vienna RNA* package and the resulting values were correlated with rTR using Spearman's correlation (**Methods**).

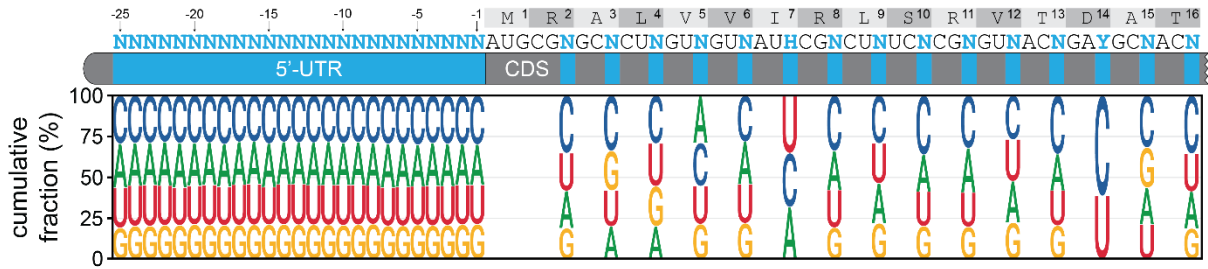

65

66 **Supplementary Figure 8: Base distribution in  $Lib_{random}$ .** The base distribution amongst all 198,174  
 67 variants of  $Lib_{random}$  above high quality read count threshold is displayed for each randomised position.  
 68 Bases are ordered from the most (top) to the least (bottom) frequent for each position. Note that in  
 69 codons 7 (Ile) and 14 (Asp) only three (A, C, U) and two (C, U) bases were allowed, respectively, to  
 70 avoid non-synonymous mutations.

71

72

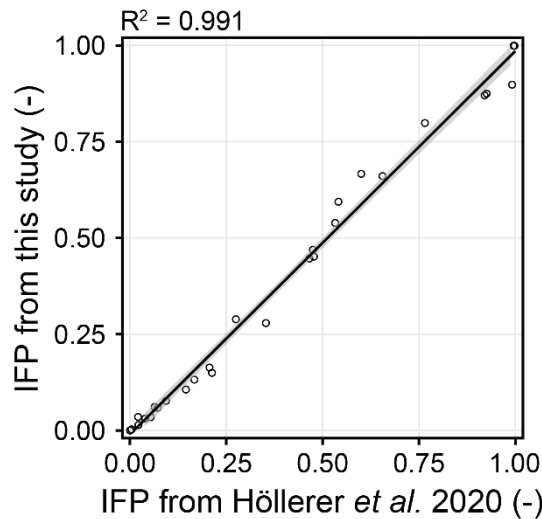

73

74 **Supplementary Figure 9: Cross-study reproducibility of uASPIre.** The IFP of 31 standard RBSs as  
 75 measured in this study is plotted over the IFP of the same standard RBSs as determined in a previous  
 76 study (1). The black line corresponds to a linear regression with 95% confidence interval (grey area).



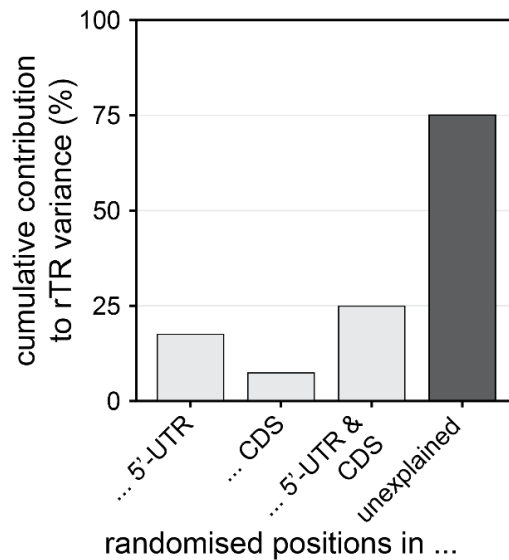

77  
78  
79  
80  
81  
82

**Supplementary Figure 10: Cumulative impact of randomised positions in 5'-UTR and CDS on the rTR.** Bars are the cumulative contribution of all randomised positions in the mRNA part(s) indicated on the horizontal axis except for “unexplained” which corresponds to the residuals. The contribution of individual positions (**Fig. 2a**) was determined by ANOVA (**Methods**).

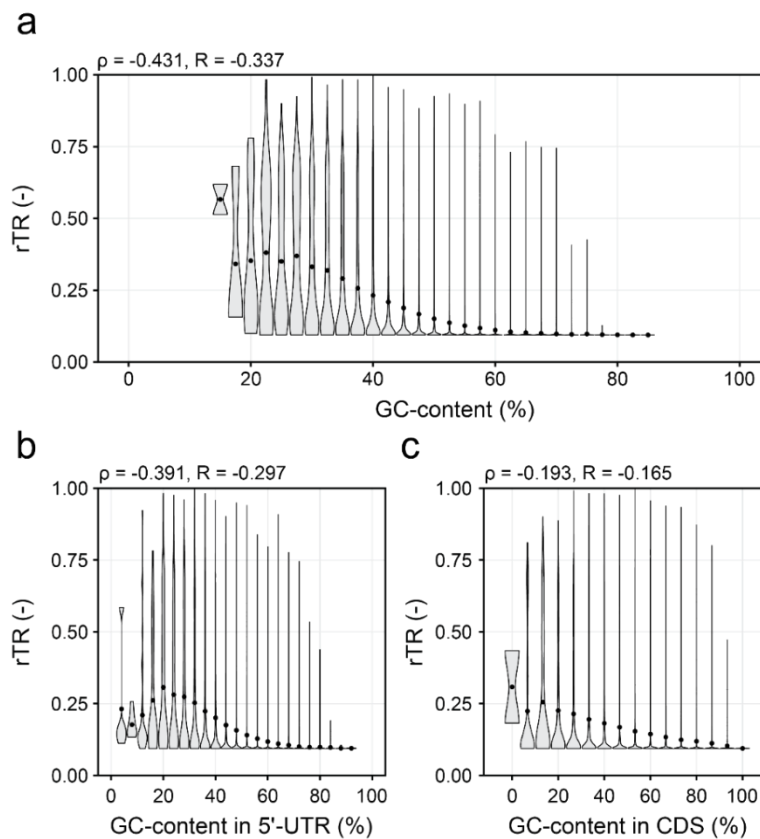

83  
84  
85  
86  
87

**Supplementary Figure 11: Impact of GC-content on rTR.** The correlation of rTR and GC-content in all randomised positions (**a**) as well as in the randomised positions in 5'-UTR (**b**) and CDS (**c**) individually was assessed. Variants were binned according to their GC-content in the respective mRNA part, and the rTR distribution of bins is displayed as violin with each bin's mean rTR (black circles).

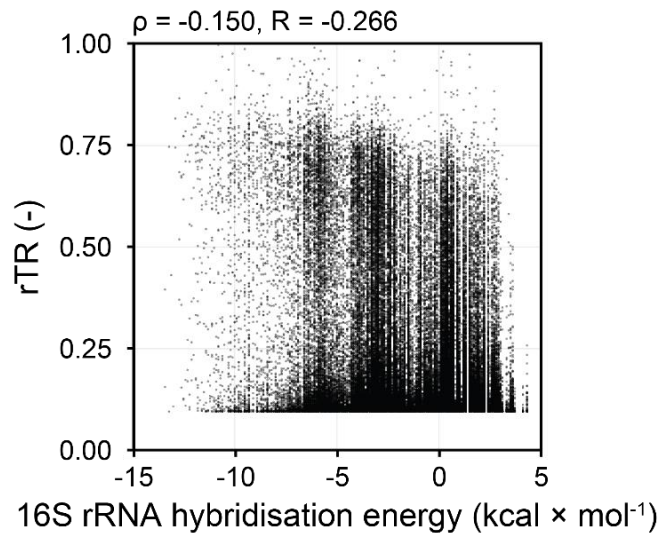

88  
89  
90  
91  
92  
93  
94

**Supplementary Figure 12: Correlation between predicted 16S rRNA hybridisation energy and rTR.** The hybridisation energy of the 3'-end of *E. coli*'s 16S rRNA (sequence: 5'-ACCUCCUUA-3') and the 5'-UTR between position -18 and -4 was predicted using *RNA duplex* of the *Vienna RNA* package and the resulting energy values were correlated with rTR.

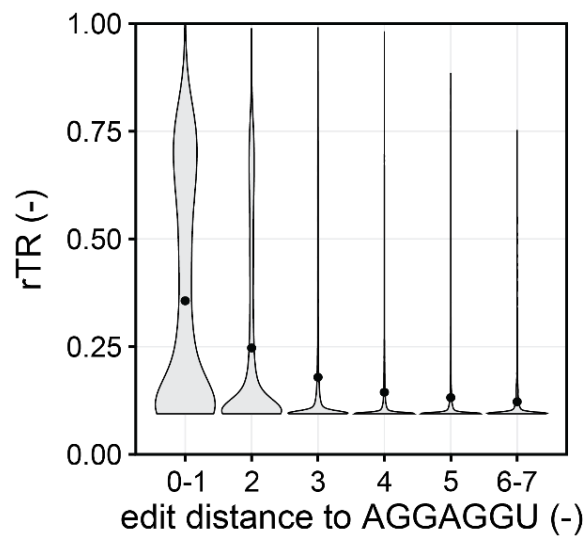

95  
96  
97  
98  
99

**Supplementary Figure 13: Impact of similarity to the SD motif on rTR.** The minimum edit distance between the canonical SD motif AGGAGGU and all 7-nt windows between 5'-UTR positions -18 and -4 was calculated for each variant (**Methods**). Violins are rTR distributions amongst variants grouped by minimum edit distance with group means (black circles).

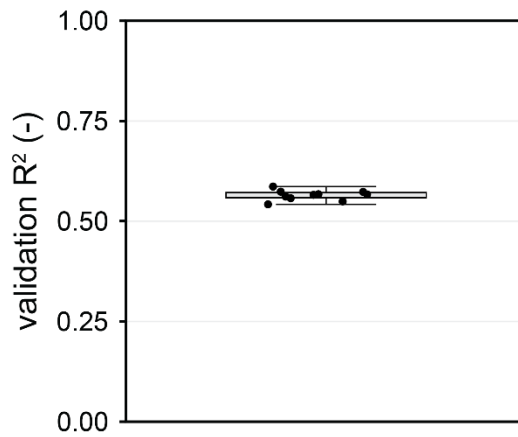

100  
101  
102  
103  
104  
105

**Supplementary Figure 14: Cross-validation of random forest model (Fig. 3e).** Validation  $R^2$  values are shown for 10 independent validation runs as circles. Box represents interquartile range with whiskers marking the 1.5-fold interquartile range.

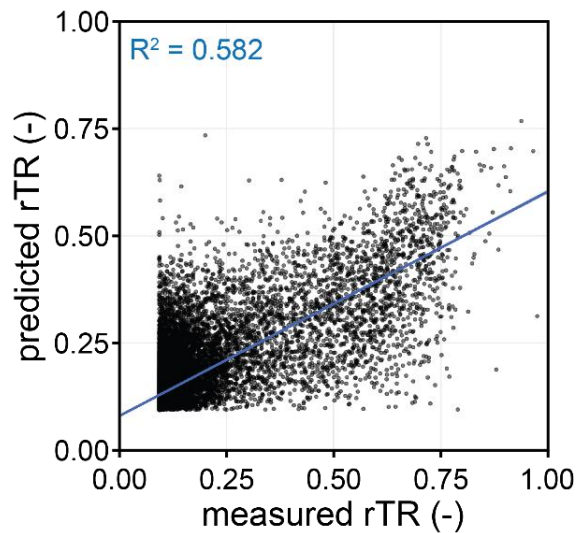

106  
107  
108  
109  
110

**Supplementary Figure 15: Random forest performance.** The rTR values predicted by the random forest model trained on  $\text{Lib}_{\text{random}}$  (compare Fig. 3e) are plotted over the experimentally measured rTRs for 19,816 randomly selected test set variants strictly held out during training. The blue line corresponds to a linear regression with corresponding Pearson's  $R^2$ .

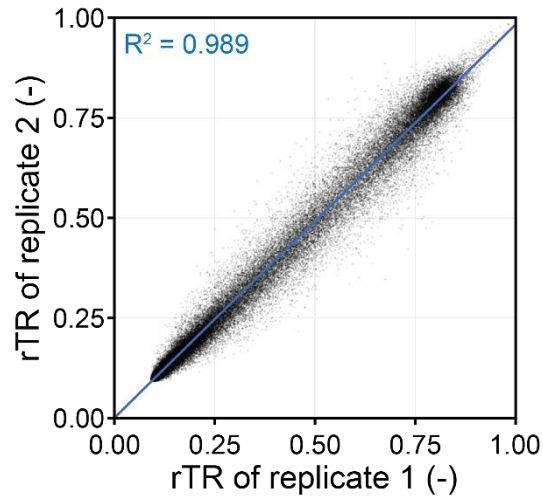

111  
 112  
 113  
 114  
 115  
 116

**Supplementary Figure 16: Biological reproducibility within Lib<sub>fact</sub>.** rTR values of two independently cultured, biological replicates of Lib<sub>fact</sub> are shown (112,296 variants). The blue line corresponds to a linear regression with corresponding Pearson's R<sup>2</sup>.

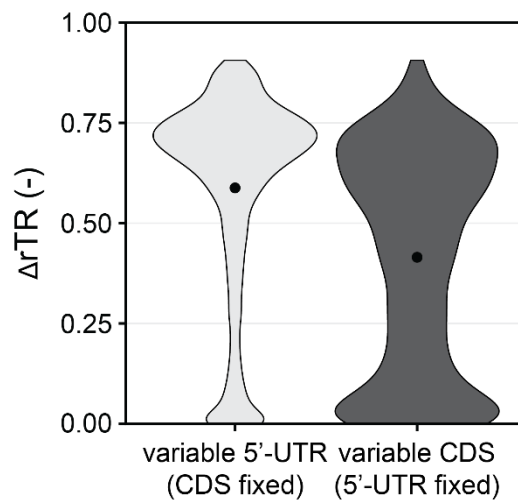

117  
 118  
 119  
 120  
 121

**Supplementary Figure 17: Coverage of rTR range upon exchange of 5'-UTR (left) and CDS (right).** For each CDS (or 5'-UTR) that appeared at least twice in all libraries, the absolute difference in rTR between the strongest and weakest 5'-UTR (or CDS) combined with this CDS (or 5'-UTR) is displayed ( $\Delta rTR$ ). Violins indicate the distribution of  $\Delta rTR$  with black circles representing the mean value.

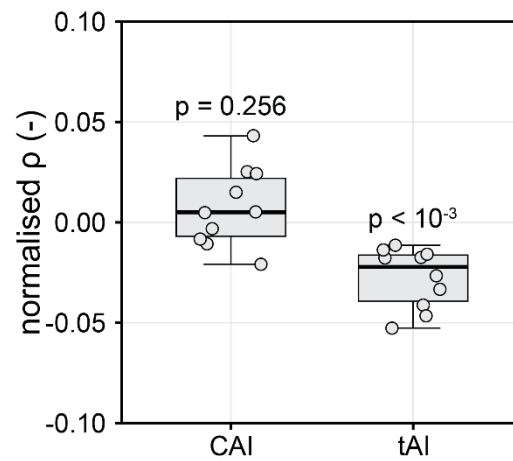

123

124 **Supplementary Figure 18: Correlation between codon indices and the CDS-derived contribution**  
125 **to rTR variance.** Pearson's correlation between CAI/tAI and the mean rTR of each CDS (over all 5'-  
126 UTRs combined with that CDS) was calculated for each of the ten batches of Lib<sub>fact</sub> (grey circles) and  
127 normalised to the mean effect of the CDS on rTR (Fig. 4c). Boxes represents interquartile range with  
128 whiskers marking the 1.5-fold interquartile range and medians as solid black lines. P-values of one  
129 sample t-tests are indicated above each box.

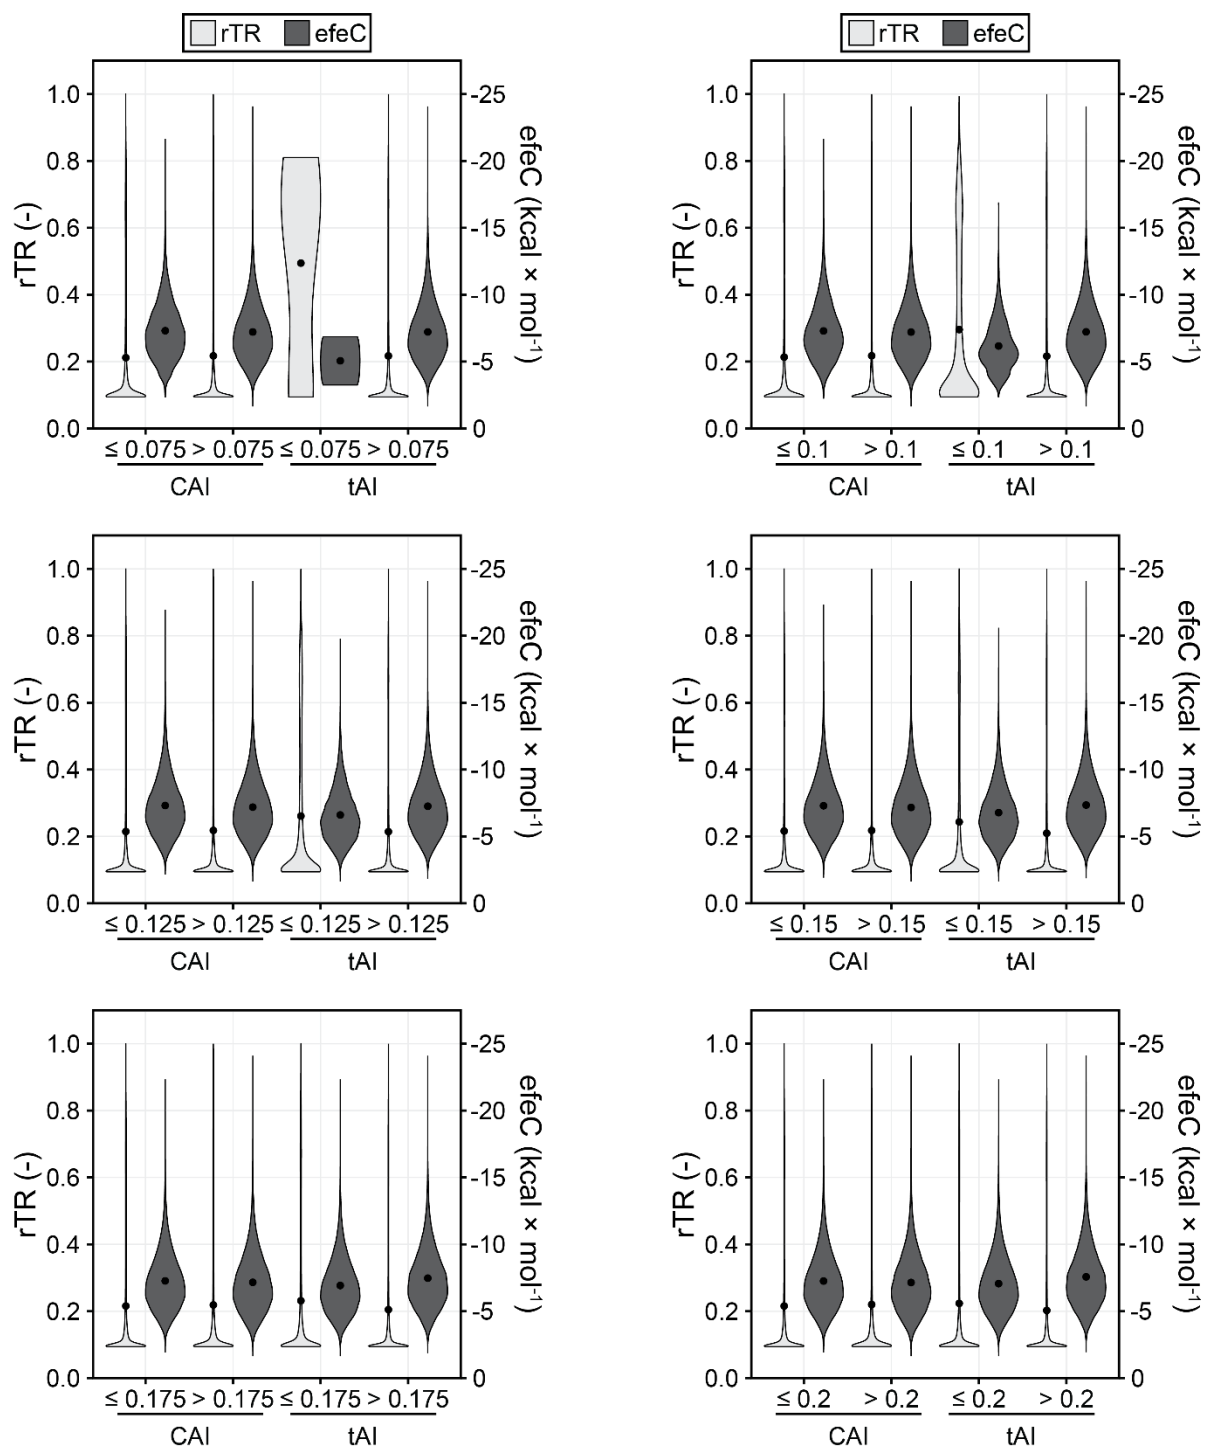

130

131 **Supplementary Figure 19: Comparison of rTRs and predicted folding energies (efeC) of variants**

132 **with low and high CAI/tAI. Different thresholds were tested for CAI and tAI. Black circles within violins**

133 **are mean rTR/efeC values (compare Fig. 4e).**

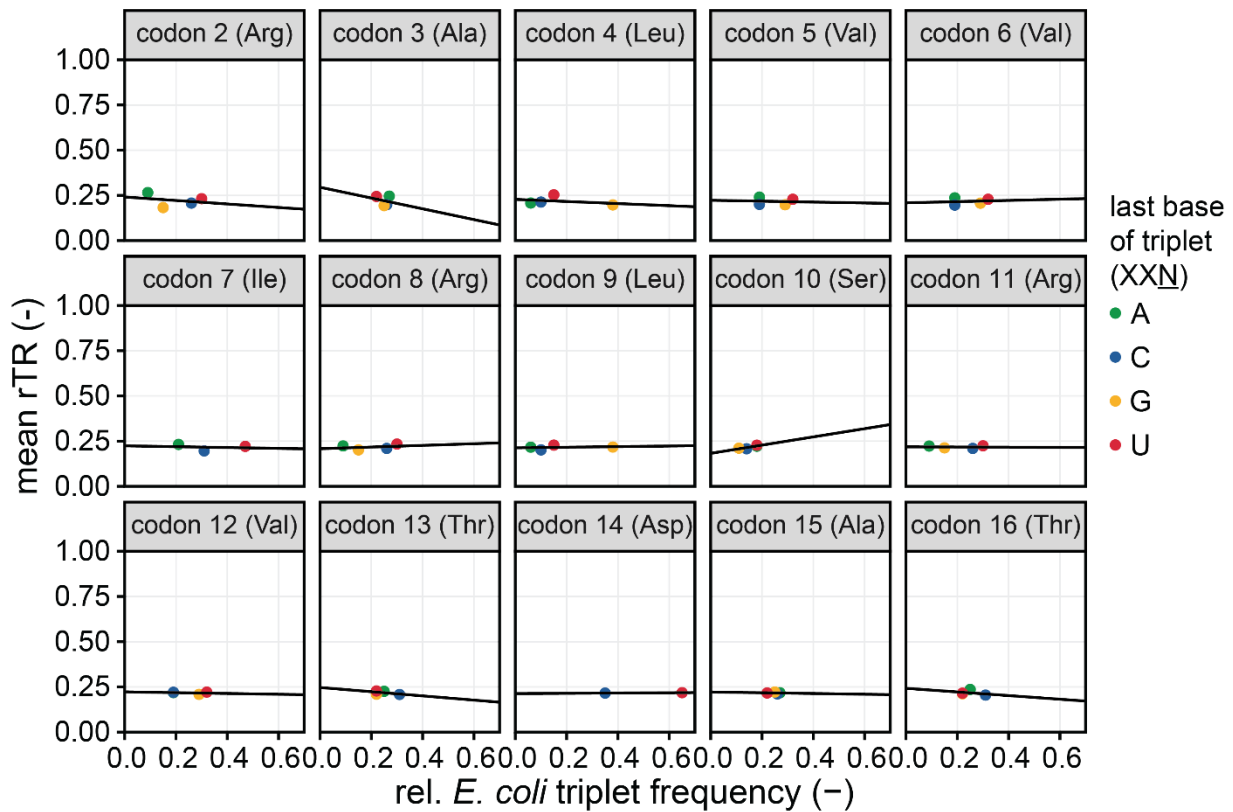

134  
 135  
 136  
 137  
 138  
 139  
 140  
 141

**Supplementary Figure 20: Dependence between triplet frequency in *E. coli* and rTR.** Mean rTRs of variants from all libraries with the same triplet in the randomised codons are plotted over the relative codon frequency of the respective triplet in *E. coli*. Triplet frequencies can be found in **Supplementary Table 6**. Black lines are best linear fits of data points. Note that no consistent up- or downward trend is observed across all codons as well as amongst triplets coding for the same amino acid but in different positions.

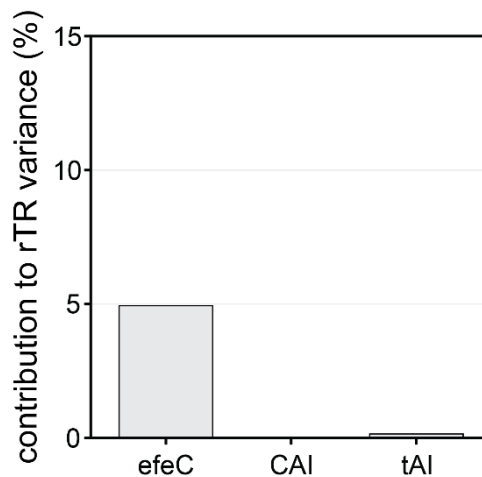

142  
 143  
 144  
 145  
 146

**Supplementary Figure 21: Contribution of efeC, CAI and tAI to the rTR variance on weakly folding mRNAs.** An ANOVA with efeC, CAI and tAI as only covariates was performed to assess their impact on the rTR amongst the 727,570 variants with low tendency for mRNA folding (i.e. efeC  $\geq$  -7.5 kcal mol<sup>-1</sup>, compare **Fig. 4f**).

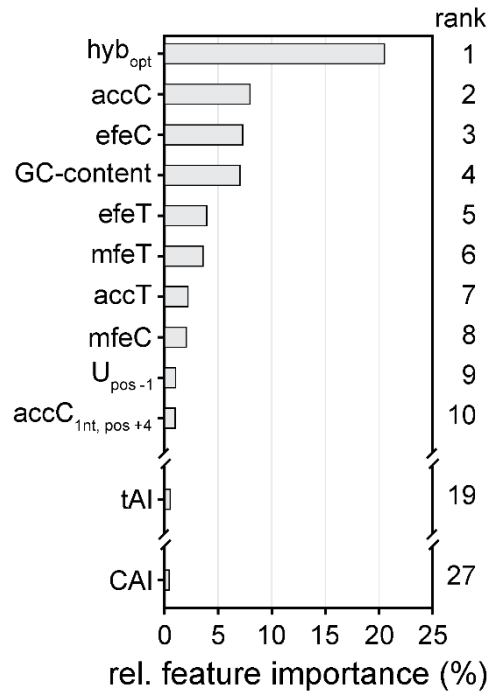

147  
148  
149  
150  
151  
152  
153

**Supplementary Figure 22: Feature importance of random forest model trained with codon usage and folding metrics.** Relative importance of the ten most important features as well as tAI and CAI for the model displayed in **Figure 5g** (second bar from left) is shown. Ranking of features is indicated to the right. AccC<sub>1nt, pos +4</sub>: AccC score for position +4 of the CDS.

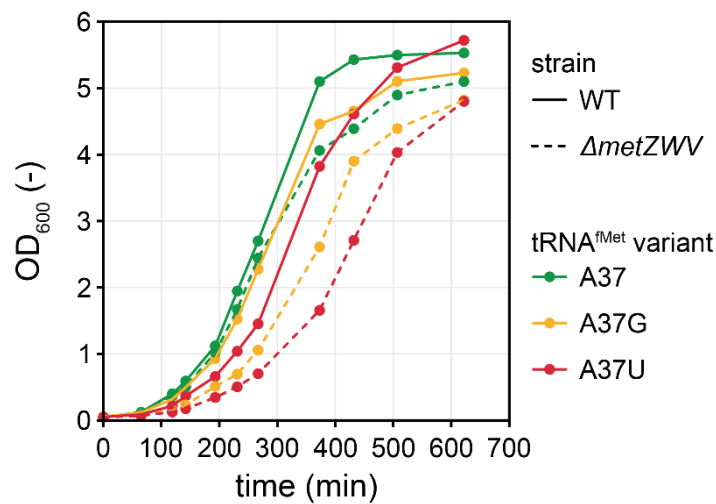

154  
155  
156  
157  
158

**Supplementary Figure 23: Growth of *E. coli* WT and  $\Delta metZ WV$  expressing different tRNA<sup>fMet</sup> variants.** Approximately 50,000 variants of Lib<sub>random</sub> were co-cultivated in shake flasks (**Methods**) for each of the six combinations of *E. coli* strains (WT or  $\Delta metZ WV$ ) and overexpressed tRNA<sup>fMet</sup> variants (A37, A37G or A37U).



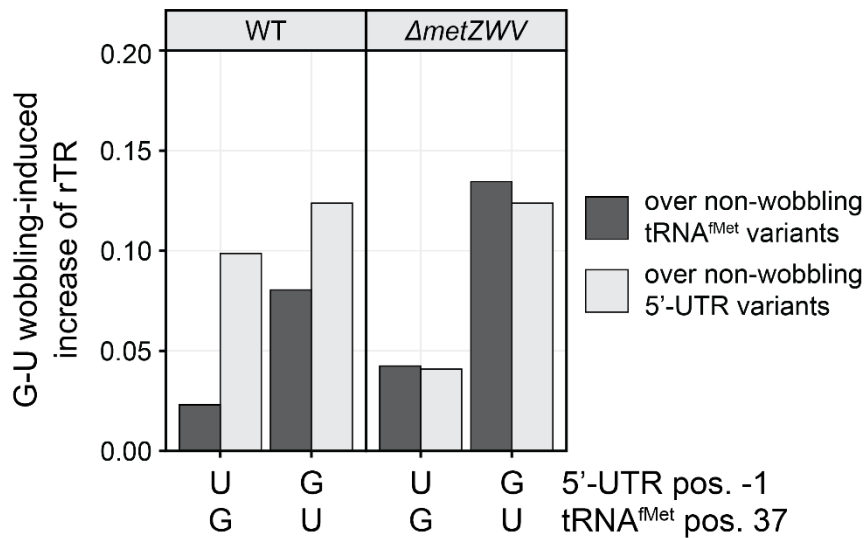

159

160 **Supplementary Figure 24: Effect of G-U wobbling on rTR.** The mean increase of the rTR is shown  
 161 for different combinations of G-U wobbling base pairs between 5'-UTR position -1 and tRNA<sup>fMet</sup> position  
 162 37 as indicated on the horizontal axis. The rTR increases of the respective wobbling pair over all  
 163 non-wobbling and non-complementary tRNA<sup>fMet</sup> variants (dark grey) or over all non-wobbling and non-  
 164 complementary 5'-UTR variants (light grey) are displayed. In order to facilitate comparison between the  
 165 different experimental groups (i.e. six combinations of strain and tRNA<sup>fMet</sup> variant), rTR values were  
 166 normalised to the mean rTR of each group prior to determination of the G-U wobbling-induced increase  
 167 of rTR.



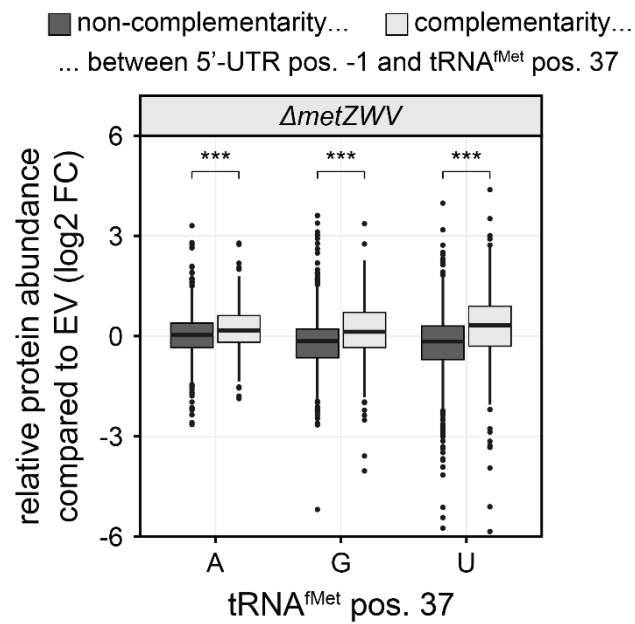

180

181 **Supplementary Figure 26: Impact of overexpression of tRNA<sup>fMet</sup> variants on endogenous protein**  
 182 **expression.** Label-free proteomics were performed on strain *ΔmetZWV* cells overexpressing tRNA<sup>fMet</sup>  
 183 variants with an A, G or U nucleotide at tRNA<sup>fMet</sup> position 37 (see **Methods**). Relative protein  
 184 abundances compared to an empty vector control (EV) are shown as log<sub>2</sub> fold-changes (log<sub>2</sub> FC) for  
 185 the 1,098 endogenous proteins detectable in all strains and replicates. Proteins are grouped according  
 186 to their complementarity or non-complementarity between 5'-UTR position -1 and tRNA<sup>fMet</sup> position 37.  
 187 \*\*\* denote p-values < 10<sup>-4</sup> in a one-sided Welch two sample t-test.

188 **Supplementary tables**

189

190 **Supplementary Table 1: Primers used in this study.** Restriction sites (BbsI/NotI/PstI/SpeI) are  
191 underlined. The introduced BbsI site is marked in orange. Primer binding regions are highlighted in bold.

| Name | Sequence (5'-3')                                                                                                                        | Description                                                                                                              |
|------|-----------------------------------------------------------------------------------------------------------------------------------------|--------------------------------------------------------------------------------------------------------------------------|
| p1   | TTTGTTCAAAATCATGCCAAATCCGTGATCGGGGTAAAAA <b>TGATCGGCAC</b><br><b>GTAAGAGGTTCC</b>                                                       | Forward primer for the generation of the knockout cassette $\Delta metZ WV::specR$                                       |
| p2   | GAGAAGGGGATGATAAAAAGGCGCTGAATGGCGCTTTTTTAT <b>TTATTGGCTG</b><br><b>GCACCAAGCAG</b>                                                      | Forward primer for the generation of the knockout cassette $\Delta metZ WV::specR$                                       |
| p3   | <b>GCGGCAAGCATTGCCACAACCGTGC</b>                                                                                                        | Forward genotyping primer for $\Delta metZ WV$                                                                           |
| p4   | <b>CGTATTTTGCCGATGGGGCGACGCTGG</b>                                                                                                      | Reverse genotyping primer for $\Delta metZ WV$                                                                           |
| p5   | <b>TCTATCAACAGGAGTCCAAG</b>                                                                                                             | Forward primer for the generation of all libraries                                                                       |
| p6   | TATATACTAGTNGTNGCRTCNGTNACNCGNAGNAGNCGDATNACNACNAG<br>NGCNCGCATNNNNNNNNNNNNNNNNNNNNNNNNNNNNNN <b>TTACGACCAGTCTAAAA</b><br><b>AGCGCC</b> | Reverse primer for the generation of Lib <sub>random</sub>                                                               |
| p7   | ATATATGCGGCCCGC <b>GAAGACT</b> TCGCATNNNNNNNNNNNNNNNNNNNNNNNNNNNNNN<br><b>TTACGACCAGTCTAAAAAGCGCC</b>                                   | Reverse primer for the generation of 5'-UTR half-library                                                                 |
| p8   | ATATATCTGCAG <b>GAAGAC</b> CCCATGCGNGCNCNTNGTNGTNATHCGNCTNTCNC<br>GNGTNACNGAYGCNACN <b>ACTAGTCCGGAACGTCACTGG</b>                        | Forward primer for the generation of CDS half-library                                                                    |
| p9   | <b>GCCTTTCGTTTTATTGATGCC</b>                                                                                                            | Reverse primer for the generation of CDS half-library and reverse primer for amplification of 5'-UTR half-library insert |
| p10  | <b>GGTTATCCAGGCTAAAATCG</b>                                                                                                             | Forward primer for the amplification of 5'-UTR half-library insert                                                       |

192

193

194 **Supplementary Table 2: Strains used in this study.**

| Name                                              | Genotype                                                                                                                                                                                                                                  | Description                                                                         | Source/Reference              |
|---------------------------------------------------|-------------------------------------------------------------------------------------------------------------------------------------------------------------------------------------------------------------------------------------------|-------------------------------------------------------------------------------------|-------------------------------|
| <i>E. coli</i> TOP10 $\Delta rhaA$                | <i>F mcrA</i> $\Delta(mrr-hsdRMS-mcrBC)$<br>$\phi 80lacZ\Delta M15 \Delta lacX74 nupG$<br><i>recA1 araD139</i> $\Delta(ara-leu)7697$<br><i>galE15 galK16 rpsL(Str<sup>R</sup>) endA1</i><br>$\lambda^- \Delta rhaA$                       | Rhamnose utilisation-deficient derivative of <i>E. coli</i> TOP10.                  | Hoellerer <i>et al.</i> (1)   |
| <i>E. coli</i> TOP10 $\Delta rhaA \Delta metZ WV$ | <i>F mcrA</i> $\Delta(mrr-hsdRMS-mcrBC)$<br>$\phi 80lacZ\Delta M15 \Delta lacX74 nupG$<br><i>recA1 araD139</i> $\Delta(ara-leu)7697$<br><i>galE15 galK16 rpsL(Str<sup>R</sup>) endA1</i><br>$\lambda^- \Delta rhaA \Delta metZ WV::specR$ | Derivative of <i>E. coli</i> TOP10 $\Delta rhaA$ with deleted <i>metZ WV</i> locus. | This study ( <b>Methods</b> ) |

195

196

197 **Supplementary Table 3: Plasmids used in this study.**

| Name                       | Description                                                                                                                                                                            | Source                        |
|----------------------------|----------------------------------------------------------------------------------------------------------------------------------------------------------------------------------------|-------------------------------|
| pSEVA291                   | contains a pBR322 replicon, a kanamycin resistance cassette, and a multiple cloning site                                                                                               | Silva-Rocha <i>et al.</i> (2) |
| pSEVA361                   | Backbone for tRNA <sup>fMet</sup> plasmids; contains a p15A replicon, a chloramphenicol resistance cassette, and a multiple cloning site                                               | Silva-Rocha <i>et al.</i> (2) |
| pASPIre3                   | Derivative of pSEVA291; contains a <i>bxh1-sfGFP</i> gene (translational fusion) under control of <i>P<sub>tha</sub></i> and an <i>attB-attP</i> -flanked 150 bp stretch of silent DNA | Hoellerer <i>et al.</i> (1)   |
| pASPIre4                   | Derivative of pASPIre3 with <i>SpeI</i> site in the CDS of <i>bxh1</i> . PCR template and backbone for all 5'-UTR and CDS libraries                                                    | This study                    |
| pASPIre4 <sub>lib</sub>    | Derivative of pASPIre4 with randomised 5'-UTR and CDS                                                                                                                                  | This study                    |
| ptRNA <sup>fMet-A37</sup>  | Derivative of pSEVA361 with expression cassette for tRNA <sup>fMet</sup> with the native A at position 37                                                                              | This study                    |
| ptRNA <sup>fMet-A37C</sup> | Derivative of ptRNA <sup>fMet-A37</sup> with A37C substitution                                                                                                                         | This study                    |
| ptRNA <sup>fMet-A37G</sup> | Derivative of ptRNA <sup>fMet-A37</sup> with A37G substitution                                                                                                                         | This study                    |
| ptRNA <sup>fMet-A37U</sup> | Derivative of ptRNA <sup>fMet-A37</sup> with A37T/U substitution                                                                                                                       | This study                    |

198

199

200 **Supplementary Table 4: DNA adapters for NGS.** Adapters contain *NcoI*- and *SpeI*-compatible  
 201 overhangs (orange) for ligation. Binding regions for Illumina flow cell (blue) and sequencing primers  
 202 (green) are highlighted. Sample-specific indices are shown in red. P: 5'-phosphorylation.

| Name                     | Sequence                                                                                                                                                                 |
|--------------------------|--------------------------------------------------------------------------------------------------------------------------------------------------------------------------|
| <i>NcoI</i> <sub>1</sub> | 5' AATGATACGGCGACCACCGAGATCTACACTCTTTCCCTACACGACGCTCTTCCGATCTATCACC 5'<br>3' TTACTATGCCGCTGGTGGCTCTAGATGTGAGAAAGGATGTGCTGCGAGAAGGCTAGAAAGTAGTGGGTAC-P 3'                 |
| <i>NcoI</i> <sub>2</sub> | 5' AATGATACGGCGACCACCGAGATCTACACTCTTTCCCTACACGACGCTCTTCCGATCTATCGATGTC 5'<br>3' TTACTATGCCGCTGGTGGCTCTAGATGTGAGAAAGGATGTGCTGCGAGAAGGCTAGATAAGCTACAGGTAC-P 3'             |
| <i>NcoI</i> <sub>3</sub> | 5' AATGATACGGCGACCACCGAGATCTACACTCTTTCCCTACACGACGCTCTTCCGATCTGATCTTGTAC 5'<br>3' TTACTATGCCGCTGGTGGCTCTAGATGTGAGAAAGGATGTGCTGCGAGAAGGCTAGACTAGAACATGGTAC-P 3'            |
| <i>NcoI</i> <sub>4</sub> | 5' AATGATACGGCGACCACCGAGATCTACACTCTTTCCCTACACGACGCTCTTCCGATCTCGATGCCAATC 5'<br>3' TTACTATGCCGCTGGTGGCTCTAGATGTGAGAAAGGATGTGCTGCGAGAAGGCTAGAGCTACGGTITAGGTAC-P 3'         |
| <i>NcoI</i> <sub>5</sub> | 5' AATGATACGGCGACCACCGAGATCTACACTCTTTCCCTACACGACGCTCTTCCGATCTTCGATACAGTGC 5'<br>3' TTACTATGCCGCTGGTGGCTCTAGATGTGAGAAAGGATGTGCTGCGAGAAGGCTAGAAAGCTATGTACAGGTAC-P 3'       |
| <i>NcoI</i> <sub>6</sub> | 5' AATGATACGGCGACCACCGAGATCTACACTCTTTCCCTACACGACGCTCTTCCGATCTATCGATACTTGAC 5'<br>3' TTACTATGCCGCTGGTGGCTCTAGATGTGAGAAAGGATGTGCTGCGAGAAGGCTAGATAGCTATGAAGTGGTAC-P 3'      |
| <i>SpeI</i> <sub>1</sub> | 5' P-CTAGAATAACGTAAGATCGGAAGAGCACACGTCTGAACTCCAGTCACATCTCGTATGCCGCTTCTGCTTG 5'<br>3' TTATTGCATTTCTAGCCTTCTCGTGTGCAGACTTGAGGTCAGTGTAGAGCATACGGCAGAAGACGAAC 3'             |
| <i>SpeI</i> <sub>2</sub> | 5' P-CTAGATTCTTGAAATAGATCGGAAGAGCACACGTCTGAACTCCAGTCACATCTCGTATGCCGCTTCTGCTTG 5'<br>3' TAAGAACTTTATCTAGCCTTCTCGTGTGCAGACTTGAGGTCAGTGTAGAGCATACGGCAGAAGACGAAC 3'          |
| <i>SpeI</i> <sub>3</sub> | 5' P-CTAGAGGCAGATCATCAGATCGGAAGAGCACACGTCTGAACTCCAGTCACATCTCGTATGCCGCTTCTGCTTG 5'<br>3' TCCGTCTAGTAGTCTAGCCTTCTCGTGTGCAGACTTGAGGTCAGTGTAGAGCATACGGCAGAAGACGAAC 3'        |
| <i>SpeI</i> <sub>4</sub> | 5' P-CTAGACTATGTTAATCGAGATCGGAAGAGCACACGTCTGAACTCCAGTCACATCTCGTATGCCGCTTCTGCTTG 5'<br>3' TGATACAATTAGCTCTAGCCTTCTCGTGTGCAGACTTGAGGTCAGTGTAGAGCATACGGCAGAAGACGAAC 3'      |
| <i>SpeI</i> <sub>5</sub> | 5' P-CTAGAGTTGACGCATCGAAGATCGGAAGAGCACACGTCTGAACTCCAGTCACATCTCGTATGCCGCTTCTGCTTG 5'<br>3' TCAACTGCGTAGCTTCTAGCCTTCTCGTGTGCAGACTTGAGGTCAGTGTAGAGCATACGGCAGAAGACGAAC 3'    |
| <i>SpeI</i> <sub>6</sub> | 5' P-CTAGAAATCTAGAAATCGATAGATCGGAAGAGCACACGTCTGAACTCCAGTCACATCTCGTATGCCGCTTCTGCTTG 5'<br>3' TTAGATGCTTAGCTATCTAGCCTTCTCGTGTGCAGACTTGAGGTCAGTGTAGAGCATACGGCAGAAGACGAAC 3' |

203

204

205

206

Supplementary Table 5: NGS runs and sample-specific adapter combinations from this study.

| NGS run       | SRA number   | Library                                                            | Sample number     | Time point (min)  | Forward adapter   | Reverse adapter   |
|---------------|--------------|--------------------------------------------------------------------|-------------------|-------------------|-------------------|-------------------|
| 1             | SAMN27867644 | Lib <sub>random</sub>                                              | 1                 | 0                 | Ncol <sub>1</sub> | Spel <sub>1</sub> |
|               |              |                                                                    | 2                 | 95                | Ncol <sub>2</sub> | Spel <sub>2</sub> |
|               |              |                                                                    | 3                 | 225               | Ncol <sub>3</sub> | Spel <sub>3</sub> |
|               |              |                                                                    | 4                 | 290               | Ncol <sub>4</sub> | Spel <sub>4</sub> |
|               |              |                                                                    | 5                 | 360               | Ncol <sub>5</sub> | Spel <sub>5</sub> |
|               |              |                                                                    | 6                 | 480               | Ncol <sub>6</sub> | Spel <sub>6</sub> |
|               |              | Lib <sub>comb1</sub>                                               | 1                 | 0                 | Ncol <sub>1</sub> | Spel <sub>2</sub> |
|               |              |                                                                    | 2                 | 95                | Ncol <sub>2</sub> | Spel <sub>3</sub> |
|               |              |                                                                    | 3                 | 225               | Ncol <sub>3</sub> | Spel <sub>4</sub> |
|               |              |                                                                    | 4                 | 290               | Ncol <sub>4</sub> | Spel <sub>5</sub> |
|               |              |                                                                    | 5                 | 360               | Ncol <sub>5</sub> | Spel <sub>6</sub> |
|               |              |                                                                    | 6                 | 480               | Ncol <sub>6</sub> | Spel <sub>1</sub> |
|               |              | Lib <sub>comb2</sub>                                               | 1                 | 0                 | Ncol <sub>1</sub> | Spel <sub>3</sub> |
|               |              |                                                                    | 2                 | 95                | Ncol <sub>2</sub> | Spel <sub>4</sub> |
|               |              |                                                                    | 3                 | 225               | Ncol <sub>3</sub> | Spel <sub>5</sub> |
|               |              |                                                                    | 4                 | 290               | Ncol <sub>4</sub> | Spel <sub>6</sub> |
|               |              |                                                                    | 5                 | 360               | Ncol <sub>5</sub> | Spel <sub>1</sub> |
|               |              |                                                                    | 6                 | 480               | Ncol <sub>6</sub> | Spel <sub>2</sub> |
| Standard RBSs | 1            | 0                                                                  | Ncol <sub>1</sub> | Spel <sub>4</sub> |                   |                   |
|               | 2            | 95                                                                 | Ncol <sub>2</sub> | Spel <sub>5</sub> |                   |                   |
|               | 3            | 225                                                                | Ncol <sub>3</sub> | Spel <sub>6</sub> |                   |                   |
|               | 4            | 290                                                                | Ncol <sub>4</sub> | Spel <sub>1</sub> |                   |                   |
|               | 5            | 360                                                                | Ncol <sub>5</sub> | Spel <sub>2</sub> |                   |                   |
|               | 6            | 480                                                                | Ncol <sub>6</sub> | Spel <sub>3</sub> |                   |                   |
| 2             | SAMN27867645 | Lib <sub>fact</sub> (replicate 1)                                  | 1                 | 0                 | Ncol <sub>1</sub> | Spel <sub>1</sub> |
|               |              |                                                                    | 2                 | 95                | Ncol <sub>2</sub> | Spel <sub>2</sub> |
|               |              |                                                                    | 3                 | 225               | Ncol <sub>3</sub> | Spel <sub>3</sub> |
|               |              |                                                                    | 4                 | 290               | Ncol <sub>4</sub> | Spel <sub>4</sub> |
|               |              |                                                                    | 5                 | 360               | Ncol <sub>5</sub> | Spel <sub>5</sub> |
|               |              |                                                                    | 6                 | 480               | Ncol <sub>6</sub> | Spel <sub>6</sub> |
|               |              | Lib <sub>fact</sub> (replicate 2)                                  | 1                 | 0                 | Ncol <sub>1</sub> | Spel <sub>6</sub> |
|               |              |                                                                    | 2                 | 95                | Ncol <sub>2</sub> | Spel <sub>5</sub> |
|               |              |                                                                    | 3                 | 225               | Ncol <sub>3</sub> | Spel <sub>4</sub> |
|               |              |                                                                    | 4                 | 290               | Ncol <sub>4</sub> | Spel <sub>3</sub> |
|               |              |                                                                    | 5                 | 360               | Ncol <sub>5</sub> | Spel <sub>2</sub> |
|               |              |                                                                    | 6                 | 480               | Ncol <sub>6</sub> | Spel <sub>1</sub> |
| 3             | SAMN27867646 | Lib <sub>random</sub> in WT strain with ptRNA <sup>fMet-A37</sup>  | 1                 | 0                 | Ncol <sub>1</sub> | Spel <sub>1</sub> |
|               |              |                                                                    | 2                 | 95                | Ncol <sub>2</sub> | Spel <sub>2</sub> |
|               |              |                                                                    | 3                 | 225               | Ncol <sub>3</sub> | Spel <sub>3</sub> |
|               |              |                                                                    | 4                 | 290               | Ncol <sub>4</sub> | Spel <sub>4</sub> |
|               |              |                                                                    | 5                 | 360               | Ncol <sub>5</sub> | Spel <sub>5</sub> |
|               |              |                                                                    | 6                 | 480               | Ncol <sub>6</sub> | Spel <sub>6</sub> |
|               |              | Lib <sub>random</sub> in WT strain with ptRNA <sup>fMet-A37G</sup> | 1                 | 0                 | Ncol <sub>1</sub> | Spel <sub>2</sub> |
|               |              |                                                                    | 2                 | 95                | Ncol <sub>2</sub> | Spel <sub>3</sub> |
|               |              |                                                                    | 3                 | 225               | Ncol <sub>3</sub> | Spel <sub>4</sub> |
|               |              |                                                                    | 4                 | 290               | Ncol <sub>4</sub> | Spel <sub>5</sub> |
|               |              |                                                                    | 5                 | 360               | Ncol <sub>5</sub> | Spel <sub>6</sub> |
|               |              |                                                                    | 6                 | 480               | Ncol <sub>6</sub> | Spel <sub>1</sub> |
|               |              | Lib <sub>random</sub> in WT strain with ptRNA <sup>fMet-A37U</sup> | 1                 | 0                 | Ncol <sub>1</sub> | Spel <sub>3</sub> |
|               |              |                                                                    | 2                 | 95                | Ncol <sub>2</sub> | Spel <sub>4</sub> |
|               |              |                                                                    | 3                 | 225               | Ncol <sub>3</sub> | Spel <sub>5</sub> |
|               |              |                                                                    | 4                 | 290               | Ncol <sub>4</sub> | Spel <sub>6</sub> |
|               |              |                                                                    | 5                 | 360               | Ncol <sub>5</sub> | Spel <sub>1</sub> |
|               |              |                                                                    | 6                 | 480               | Ncol <sub>6</sub> | Spel <sub>2</sub> |
|               |              |                                                                    | 1                 | 0                 | Ncol <sub>1</sub> | Spel <sub>4</sub> |

|   |              |                                                                                 |   |     |                   |                   |
|---|--------------|---------------------------------------------------------------------------------|---|-----|-------------------|-------------------|
| 3 | SAMN27867646 | Lib <sub>random</sub> in $\Delta metZWV$ strain with ptRNA <sup>fMet-A37</sup>  | 2 | 95  | Ncol <sub>2</sub> | Spel <sub>5</sub> |
|   |              |                                                                                 | 3 | 225 | Ncol <sub>3</sub> | Spel <sub>6</sub> |
|   |              |                                                                                 | 4 | 290 | Ncol <sub>4</sub> | Spel <sub>1</sub> |
|   |              |                                                                                 | 5 | 360 | Ncol <sub>5</sub> | Spel <sub>2</sub> |
|   |              |                                                                                 | 6 | 480 | Ncol <sub>6</sub> | Spel <sub>3</sub> |
|   |              |                                                                                 | 1 | 0   | Ncol <sub>1</sub> | Spel <sub>5</sub> |
|   |              | Lib <sub>random</sub> in $\Delta metZWV$ strain with ptRNA <sup>fMet-A37G</sup> | 2 | 95  | Ncol <sub>2</sub> | Spel <sub>6</sub> |
|   |              |                                                                                 | 3 | 225 | Ncol <sub>3</sub> | Spel <sub>1</sub> |
|   |              |                                                                                 | 4 | 290 | Ncol <sub>4</sub> | Spel <sub>2</sub> |
|   |              |                                                                                 | 5 | 360 | Ncol <sub>5</sub> | Spel <sub>3</sub> |
|   |              |                                                                                 | 6 | 480 | Ncol <sub>6</sub> | Spel <sub>4</sub> |
|   |              |                                                                                 | 1 | 0   | Ncol <sub>1</sub> | Spel <sub>6</sub> |
|   |              | Lib <sub>random</sub> in $\Delta metZWV$ strain with ptRNA <sup>fMet-A37U</sup> | 2 | 95  | Ncol <sub>2</sub> | Spel <sub>1</sub> |
|   |              |                                                                                 | 3 | 225 | Ncol <sub>3</sub> | Spel <sub>2</sub> |
|   |              |                                                                                 | 4 | 290 | Ncol <sub>4</sub> | Spel <sub>3</sub> |
|   |              |                                                                                 | 5 | 360 | Ncol <sub>5</sub> | Spel <sub>4</sub> |
|   |              |                                                                                 | 6 | 480 | Ncol <sub>6</sub> | Spel <sub>5</sub> |

208

209

210 **Supplementary Table 6: Codon weight and frequencies for calculation of CAI and tAI.**211 w(CAI)/w(tAI): weight for the calculation of CAI (Sharp *et al.* (3))/tAI (dos Reis *et al.* (4)). *E. coli* fraction:212 fraction of each triplet amongst all triplets coding for the same amino acid in the *E. coli* genome213 (according to: <https://www.kazusa.or.jp/codon/>).

| Triplet | Amino acid | w(CAI) | w(tAI) | Rel. codon frequency |
|---------|------------|--------|--------|----------------------|
| GCA     | Ala        | 0.586  | 0.375  | 0.270                |
| GCC     | Ala        | 0.122  | 0.250  | 0.260                |
| GCG     | Ala        | 0.424  | 0.120  | 0.250                |
| GCU     | Ala        | 1.000  | 0.110  | 0.220                |
| AGA     | Arg        | 0.004  | 0.125  | 0.130                |
| AGG     | Arg        | 0.002  | 0.165  | 0.070                |
| CGA     | Arg        | 0.004  | 0.000  | 0.090                |
| CGC     | Arg        | 0.356  | 0.360  | 0.260                |
| CGG     | Arg        | 0.004  | 0.125  | 0.150                |
| CGU     | Arg        | 1.000  | 0.500  | 0.300                |
| AAC     | Asn        | 1.000  | 0.500  | 0.410                |
| AAU     | Asn        | 0.051  | 0.220  | 0.590                |
| GAC     | Asp        | 1.000  | 0.375  | 0.350                |
| GAU     | Asp        | 0.434  | 0.165  | 0.650                |
| UGC     | Cys        | 1.000  | 0.125  | 0.480                |
| UGU     | Cys        | 0.500  | 0.055  | 0.520                |
| CAA     | Gln        | 0.124  | 0.250  | 0.350                |
| CAG     | Gln        | 1.000  | 0.330  | 0.650                |
| GAA     | Glu        | 1.000  | 0.500  | 0.640                |
| GAG     | Glu        | 0.259  | 0.160  | 0.360                |
| GGA     | Gly        | 0.010  | 0.125  | 0.190                |
| GGC     | Gly        | 0.724  | 0.500  | 0.290                |
| GGG     | Gly        | 0.019  | 0.165  | 0.180                |
| GGU     | Gly        | 1.000  | 0.220  | 0.340                |
| CAC     | His        | 1.000  | 0.125  | 0.370                |
| CAU     | His        | 0.291  | 0.055  | 0.630                |
| AUA     | Ile        | 0.003  | 0.163  | 0.210                |
| AUC     | Ile        | 1.000  | 0.375  | 0.310                |
| AUU     | Ile        | 0.185  | 0.165  | 0.470                |
| CUA     | Leu        | 0.007  | 0.125  | 0.060                |
| CUC     | Leu        | 0.037  | 0.125  | 0.100                |

|     |     |       |       |       |
|-----|-----|-------|-------|-------|
| CUG | Leu | 1.000 | 0.540 | 0.380 |
| CUU | Leu | 0.042 | 0.055 | 0.150 |
| UUA | Leu | 0.020 | 0.125 | 0.180 |
| UUG | Leu | 0.020 | 0.165 | 0.130 |
| AAA | Lys | 1.000 | 0.750 | 0.710 |
| AAG | Lys | 0.253 | 0.240 | 0.290 |
| AUG | Met | 1.000 | 1.000 | 1.000 |
| UUC | Phe | 1.000 | 0.250 | 0.360 |
| UUU | Phe | 0.296 | 0.110 | 0.640 |
| CCA | Pro | 0.135 | 0.125 | 0.230 |
| CCC | Pro | 0.012 | 0.125 | 0.160 |
| CCG | Pro | 1.000 | 0.165 | 0.370 |
| CCU | Pro | 0.070 | 0.055 | 0.240 |
| AGC | Ser | 0.410 | 0.125 | 0.200 |
| AGU | Ser | 0.085 | 0.055 | 0.180 |
| UCA | Ser | 0.077 | 0.125 | 0.180 |
| UCC | Ser | 0.744 | 0.250 | 0.140 |
| UCG | Ser | 0.017 | 0.165 | 0.110 |
| UCU | Ser | 1.000 | 0.110 | 0.180 |
| ACA | Thr | 0.076 | 0.125 | 0.250 |
| ACC | Thr | 1.000 | 0.250 | 0.310 |
| ACG | Thr | 0.099 | 0.290 | 0.220 |
| ACU | Thr | 0.965 | 0.110 | 0.220 |
| UGG | Trp | 1.000 | 0.165 | 1.000 |
| UAC | Tyr | 1.000 | 0.375 | 0.350 |
| UAU | Tyr | 0.239 | 0.165 | 0.650 |
| GUA | Val | 0.495 | 0.625 | 0.190 |
| GUC | Val | 0.066 | 0.250 | 0.190 |
| GUG | Val | 0.221 | 0.200 | 0.290 |
| GUU | Val | 1.000 | 0.110 | 0.320 |



215 **Supplementary Table 7: Optimisation of hybridisation window.** Correlation between rTR and the  
 216 mean hybridisation energy of different sequence windows with different lengths. The mean of the  
 217 hybridisation energy at position -11 and position -10 (rank 1) was denoted  $hyb_{opt}$ . The data was ranked  
 218 by the sum of R and  $\rho$ .

| Rank | Window length (nt) | Window start (5'-UTR pos.) | Pearson's R | Spearman's $\rho$ |
|------|--------------------|----------------------------|-------------|-------------------|
| 1    | 2                  | -11                        | -0.298      | -0.170            |
| 2    | 3                  | -11                        | -0.298      | -0.167            |
| 3    | 4                  | -12                        | -0.299      | -0.166            |
| 4    | 3                  | -12                        | -0.294      | -0.165            |
| 5    | 5                  | -12                        | -0.295      | -0.161            |
| 6    | 5                  | -13                        | -0.292      | -0.160            |
| 7    | 6                  | -13                        | -0.293      | -0.159            |
| 8    | 2                  | -10                        | -0.288      | -0.162            |
| 9    | 4                  | -11                        | -0.289      | -0.159            |
| 10   | 7                  | -13                        | -0.287      | -0.152            |
| 11   | 2                  | -12                        | -0.280      | -0.159            |
| 12   | 4                  | -13                        | -0.281      | -0.156            |
| 13   | 6                  | -12                        | -0.285      | -0.152            |
| 14   | 7                  | -14                        | -0.283      | -0.151            |
| 15   | 8                  | -14                        | -0.281      | -0.148            |
| 16   | 6                  | -14                        | -0.278      | -0.150            |
| 17   | 3                  | -10                        | -0.275      | -0.151            |
| 18   | 5                  | -11                        | -0.274      | -0.147            |
| 19   | 8                  | -13                        | -0.274      | -0.143            |
| 20   | 9                  | -14                        | -0.272      | -0.140            |

219

220

221 **Supplementary Notes**

222

223 **Supplementary Note 1: Sequence of spectinomycin resistance gene (*specR*) including**  
224 **constitutive promoter used for knockout of *metZ*WV. The start and stop codon of *specR* are**  
225 **underlined.**

226 TGATCGGCACGTAAGAGGTTCCAAC<sup>TTT</sup>CACCATAATGAAATAAGATCACTACCGGGCGTATTTTTTGGAGTTATC  
227 GAGATTTTTCAGGAGCTAAGGAAGCTACATATGAGTGAAAAAGTGCCCGCCGAGATTTTCGGTGAAC<sup>ACT</sup>TATCACAAG  
228 CACTCAACGTCATCGGGGCCACTTGGAGTCGACGTTGCTGGCCGTGCATTTGTACGGCTCCGCAC<sup>TGG</sup>ATGGCG  
229 GATTGAAACCGTACAGTGATATTGATTTGCTGGTGA<sup>CTGT</sup>AGCTGCACCGCTCAATGATGCCGTGCGGCAAGCCC  
230 TGCTCGTCGATCTCTTGGAGTTTTAGCTTCCCCTGGCCAAAACAAGGCACTCCGCGCCTTGGAA<sup>GTG</sup>ACCATCG  
231 TCGTGCACAGTGACATCGTACCTTGGCGTTATCCGGCCAGGCGGAACTGCAGTTCGGAGAGTGGCAGCGCAAAG  
232 ACATCCTTGCGGGCATCTTCGAGCCCCGCCACAACCGATTCTGACTTGGCGATTCTGCTAACAAAGGCAAAGCAAC  
233 ATAGCGTCGTCTTGGCAGGTTTCCAGCAGCGAAGGATCTCTTCAGCTCAGTCCCAGAAAGCGATCTATTCAAGGCAC  
234 TGGCCGATACTCTGAAGCTATGGA<sup>ACT</sup>CGCCGCCAGATTGGGCGGGCGATGAGCGGAATGTAGTGC<sup>T</sup>TACTTTGT  
235 CTCGTATCTGGTACACCGCAGCAACCGGCAAGATCGCGCCAAAGGATGTTGCTGCCACTTGGGCAATGGCAGCT  
236 TGCCAGCTCAACATCAGCCCATCTGTTGAATGCCAAGCGGGCTTATCTTGGGCAAGAAGAAGATTATTTGCCCG  
237 CTCGTGCGGATCAGGTGGCGGCGCTCATTAAATTCGTGAAGTATGAAGCAGTTAAACTGC<sup>TTGGT</sup>GCCAGCCAAT  
238 AA  
239

240 **Supplementary Note 2: Sequence of pASPIre4. The displayed sequence corresponds to the insert**  
241 **between HindIII and PacI restriction sites (underlined) in pSEVA291. A graphical representation of**  
242 **pASPIre4 is shown in Supplementary Figure 1.**

243 AAGCTTCACATCTGCAGTAATCGGCCGGCTTGTGACGACGGCGGTCTCCGTCGTCAGGATCATCCGGGCATCGC  
244 TTAGTCACCTTTGGGCCACGGTCCGCTACCTTACAGGAATAGTACTCGTCCTTTAATTTGGAATGAACCATGGCA  
245 GTCAGTTGTGTTGCGTTTTCTTCGACCTAGTACTCGCTCCCTTAGGAGAAAAGACAGATAGCTTCTTACCCGGGGTT  
246 TGTACCGTACACCACTGAGACCGCGGTGGTTGACCAGACAAACCACGAAGTTCTGTTAAGTAACTGAACCCAAT  
247 GTCGTTAGTGACGCTTACCTCTTAAGAGGTCACTGACCTAACAGGATCCCACCACAATTCAGCAAATTTGTGAACA  
248 TCATCACGTTTCATCTTTCCCTGGTTGCCAATGGCCCATTTTCTGTGCTAAGGAGGTCGCGAATTCAGGCG  
249 CTTTTTAGACTGGTCGTAATGAAGAGCTCAATAAATATTTAATTTATCTCAGAAAGGCTAAGACATGCGAGCACT  
250 GGTGTTTATTTCGTCTGAGCCGTGTTACCGATGCAACCACTAGTCCGGAACGTCAGCTGGAAGCTGTCAGCAGCT  
251 GTGTGCACAGCGTGGTTGGGATGTTGTTGGTGTGTCAGAGGATCTGGATGTTAGCGGTGCAGTTGATCCGTTTTGA  
252 TCGTAAACGTCGTCCGAATCTGGCAGTTGGCTGGCATTTGAAGAACAGCCGTTTATGTTATGTTGCCTATCG  
253 TGTTGATCGTCTGACCCGTAGCATTTCGTATCTGCAACAGCTGGTTCATTGGGCAGAAGATCATAAAAAACTGGT  
254 TGTGAGCGCAACCGAACACATTTTATACCACCCCGTTTGCAGCAGTTGTTATTGCACTGATGGGCACCGT  
255 TGCAGATGGAACCTGGAAGCAATTAAGAAGCTGATTCAGCGAGCCCAATTTAACATCTCGTGCAGTAAATA  
256 TCGTGGTAGCCTGCCTCCGTGGGTTATCTGCCGACGCGTGTAGATGTTGAATGGCGTCTGGTTCCCTGACCCGTT  
257 TCAGCGTGAACGTTATTCTGGAAGTATATCATCGTGTGGTGGATAATCATGAACCGCTGCATCTGGTTGCACATGA  
258 TCTGAATCGTCTGGTGTCTGAGTCCCAAGATTATTTTTGCTCAGCTGCAAGGTCGTGAACCGCAGGGTTCGTGA  
259 ATGGTCTGCAACCGCACTGAAACGTAGCATGATTAGCGAAGCAATGCTGGGTTATGCAACCCCTGAATGGTAAAAC  
260 CGTTCGTGATGATGATGGTGCACCGCTGGTTCGTGCAGAACCAGATTCTGACACGTGAACAGCTGGAAGCACTGCG  
261 TGCCGAACCTGGTTAAAACAGCCGTGCAAAACCGGCAGTTAGCACCCCGAGCCTGCTGCTGCGTGTCTGTTTTG  
262 TGCAGTTTGTGGTGAACCGGCATACAAATTTGCCGGTGGTGGTTCGTAAACATCCGCGTTATCGTTGTCGTAGCAT  
263 GGGTTTTCCGAAACATTGTGGTAATGGTACAGTTGCAATGGCAGAATGGGATGCATTTTGCGAAGAACAGGTTCT  
264 GGATCTGCTGGGTGATGCCGAACGCTCTGGA<sup>AAA</sup>AGTTTGGGTTGCAGGTAGCGATAGCGCAGTTGAACTGGCCGA  
265 AGTTAATGCGGAACCTGGTCGATCTCACCAGTCTGATTGGAAGTCCCGCATATCGTGCGGGTAGTCCCTCAGCGTGA  
266 AGCACTGGATGCACGATTTGCAGCACTGGCAGCACGTCGAAGAAGAACTGGAAGGTCGGAAGCACGTCAGGCGG  
267 TTGGGAATGGCGTGAACAGGTCAGCGTTTTGGTGGTGGTGGCGTGAGCAGGATACCGCAGCAAAAAATACCTG  
268 GCTGCGTAGTATGAATGTTTCGCTGACCTTTGATGTTTCGCGGTGGCCTGACCCGCACCATGATTTTGGCGATCT  
269 GCAAGAATATGAACAGCATCTGCGTCTGGGTAGCGTTGTTGAACGCTCTGCATACCGGCATGAGCACCGGCGGTGG  
270 CAGCGGCGGTTCTGGTGGCTCTAGCAAAGGAGAAGAACTTTTCACTGGAGTTGTCCCAATTTCTGTTGAATTAGA  
271 TGGTGTATGTTAATGGGCACAAATTTTCTGTCCGTGGAGAGGGTGAAGGTGATGCTACAAACGGAAAAC<sup>T</sup>CACCT  
272 TAAATTTATTTGC<sup>ACT</sup>ACTGGA<sup>AA</sup>ACTAGCTGTTCCGTGGCCAACTGTTACTACTACTGACCTATGGTGTTC  
273 ATGCTTTTCCCGTATCCGGATCACAACCGCATGACTTTTCAAGAGTGCCATGCCGAAGGTTATGTACA  
274 GGAACGCACTATATCTTTCAAAGATGACGGGACCTACAAGACCGTGC<sup>TGA</sup>AGTCAAGTTTGAAGGTGATACCCT  
275 TGTTAATCGTATCGAGTTAAAGGTTATTGATTTTAAAGAAGATGGAAACATTTCTTGGACACAACTCGAGTACAA  
276 CTTTAACTCACACAATGTATACATCACGGCAGACAAAACAAAAGAAATGGAATCAAAGCTAACTTCAAAATTCGCCA

277 CAACGTTGAAGATGGTTCCGTTCAACTAGCAGACCATTATCAACAAAATACTCCAATTGGCGATGGCCCTGTCCT  
278 TTTACCAGACAACCATTACCTGTGCGACACAATCTGTCTTTTGAAGATCCCAACGAAAAGCGTGACCACATGGT  
279 CCTTCTTGAGTTTGTAACTGCTGCTGGGATTACACATGGCATGGATGAACTTACAAAAGGCCGTGCTGCTAACGA  
280 CGAAAACACTACGCTCTGGCTGCTTAATAAGCGGCCCGCGCCTAGGCGGCCCTCTGTGTGAAATTGTTATCCGCTTT  
281 AATTAA  
282

283 **Supplementary Note 3: Sequence of pASPIre4<sub>lib</sub>.** The displayed sequence corresponds to the insert  
284 between PstI and NotI restriction sites (underlined) in pASPIre4. A graphical representation of  
285 pASPIre4<sub>lib</sub> is shown in **Supplementary Figure 2.**

286 CTGCAGTAATCGGCCGGCTTGTGCGACGACGGCGGTCTCCGTCGTCAGGATCATCCGGGCATCGCTTAGTCACCTT  
287 TGGGCCACGGTCCGCTACCTTACAGGAATAGTACTCGTCTTTAATTTGGAATGAACCATGGCAGTCAGTTGTGT  
288 TGCGTTTCTTCGACCTAGTACTCGCTCCCTTAGGAGAAAAGACAGATAGCTTCTTACCCGGGTTTGTACCGTACA  
289 CCACTGAGACCGCGGTGGTTGACCAGACAAACCAGAAAGTTCTGTAAAGTAACTGAACCCAATGTCGTTAGTGA  
290 CGCTTACCTCTTAAGAGGTCAGTACCTAACAGGATCCACCACAATTCAGCAAATTTGTGAACATCATCACGTTT  
291 ATCTTTCCCTGGTTGCCAATGGCCATTTTCTGTGAGTAAACGAGAAAGGTCGCGAATTCAGGCGCTTTTTAGACT  
292 GGTGCGTAANNNNNNNNNNNNNNNNNNNNNNNNNNNATGCGNGCNCNTNGTNGTNATHCGNCNTNCNGNGTNACNGAY  
293 GCNACNACTAGTCCGGAACGTCAGCTGGAAAGCTGTCAGCAGCTGTGTGCACAGCGTGGTTGGGATGTTGTTGGT  
294 GTTGCGAGAGGATCTGGATGTTAGCGGTGCAGTTGATCCGTTTGTATCGTAAACGTCGTCGAAATCTGGCACGTTGG  
295 CTGGCATTGGAAGAACAGCCGTTTGTATGTTATTGTTGCCTATCGTGTGATCGTCTGACCCGTAGCATTCGTCAT  
296 CTGCAACAGCTGGTTCATTGGGCAGAAGATCATAAAAACTGGTTGTTGAGCGCAACCGAAGCACATTTTGATACC  
297 ACCACCCCGTTTGCAGCAGTTGTTATTGCACTGATGGGCACCGTTGCACAGATGGAACGGAAGCAATTAAGAA  
298 CGTAATCGTAGCGCAGCCATTTTAAACATTCGTGCAGGTAAATATCGTGGTAGCCTGCCCTCCGTGGGGTTATCTG  
299 CCGACGCGTGTAGATGGTGAATGGCGTCTGGTTCCCTGACCCGGTTTCAGCGTGAACGTAATTCGGAAGTATATCAT  
300 CGTGTGGTGGATAATCATGAACCGCTGCATCTGGTTGCACATGATCTGAATCGTGTGGTGTCTGAGTCCCAA  
301 GATTATTTTGCTCAGCTGCAAGGTCGTGAACCGCAGGGTTCGTGAATGGTCTGCAACCGCACTGAAACGTAGCATG  
302 ATTAGCGAAGCAATGCTGGGTTATGCAACCCGTAATGGTAAAACCGTTCGTGATGATGATGGTGCACCGCTGGTT  
303 CGTGCAGAACCATTCTGACACGCTGAACAGCTGGAAGCAGTCCGTCGCGAATGTTAAAACCGCCGTGCAAAA  
304 CCGGCAGTTAGCACCCCGAGCTGCTGCTGCTGTTCTGTTTGTGTCAGTTTGTGGTGAACCGGCATACAAATTT  
305 GCCGGTGGTGGTCGTAAACATCCGCGTTATCGTTGTCGTAGCATGGGTTTTCCGAAACATTTGTGGTAATGGTACA  
306 GTTGCAATGGCAGAATGGGATGCATTTTGCGAAGAACAGGTTCTGGATCTGCTGGGTGATGCCGAACGTCTGGAA  
307 AAAGTTTGGGTTGCAGGTAGCGATAGCGCAGTTGAACTGGCCGAAGTTAATGCGGAACGGTTCGATCTCACCAGT  
308 CTGATTGGAAGTCCCGCATATCGTGCGGGTAGTCTCAGCGTGAAGCACTGGATGCACGTATTGCAGCACTGGCA  
309 GCACGTCAAGAAGAAGTGAAGGTTCTGGAAGCACGTCCGAGCGGTTGGGAATGGCGTGAACAGGTCAGCGTTTT  
310 GGTGATTGGTGGCGTGAGCAGGATACCGCAGCAAAAAATACCTGGCTGCGTAGTATGAATGTTCCGCTGACCTTT  
311 GATGTTCCGCGGTGGCCTGACCCGCACCATTTGATTTTGGCGATCTGCAAGAATATGAACAGCATCTGCGTCTGGGT  
312 AGCGTTGTTGAACGTCGATACCGGCATGAGCACCGCGGTTGGCAGCGCGGTTCTGGTGGCTCTAGCAAAGGA  
313 GAAGAACTTTTCACTGGAGTTGTCCCAATCTTGTGTAATTAGATGGTGTGTTAATGGGCACAAATTTTCTGTC  
314 CGTGGAGAGGGTGAAGGTGATGCTACAAACGGAAAACCTCACCTTAAATTTATTTGCACTACTGGAACACTACCT  
315 GTTCCGTGGCCAACACTTGTCACTACTCTGACCTATGGTGTTCATGCTTTTTCCCGTTATCCGGATCACATGAAA  
316 CGGCATGACTTTTTCAAGAGTGCCATGCCCCGAAGGTTATGTACAGGAACGCACTATATCTTTCAAAGATGACGGG  
317 ACCTACAAGACGCGTGTGAAGTCAAGTTTGAAGGTGATACCTTGTAAATCGTATCGAGTTAAAGGGTATTGAT  
318 TTTAAAGAAGATGGAACATTTCTGGACACAACTCGAGTACAATTTAACTCACACAATGTATAACATCACGGCA  
319 GACAAACAAAAGAATGGAATCAAAGCTAACTTCAAAATTCGCCACAACGTTGAAGATGGTTCCGTTCAACTAGCA  
320 GACCATTATCAACAAAATACTCCAATTGGCGATGGCCCTGTCTTTTACCAGACAACCATTACCTGTCGACACAA  
321 TCTGTCTTTCGAAAGATCCCAACGAAAAGCGTGACCACATGGTCTTCTTGAGTTTGTAACTGCTGCTGGGATT  
322 ACACATGGCATGGATGAACTCTACAAAAGGCCGTGCTGCTAACGACGAAAACACTACGCTCTGGCTGCTTAATAAGCG  
323 GCCGC  
324

325 **Supplementary Note 4: Sequence of 5'-UTR half-library.** The displayed sequence corresponds to  
326 the insert between PstI and NotI restriction sites (underlined) in pASPIre4. The BbsI restriction site for  
327 scarless cloning of 5'-UTR-CDS combinations is marked in orange. A graphical representation is  
328 available in **Supplementary Figure 4.**

329 CTGCAGTAATCGGCCGGCTTGTGCGACGACGGCGGTCTCCGTCGTCAGGATCATCCGGGCATCGCTTAGTCACCTT  
330 TGGGCCACGGTCCGCTACCTTACAGGAATAGTACTCGTCTTTAATTTGGAATGAACCATGGCAGTCAGTTGTGT  
331 TGCGTTTCTTCGACCTAGTACTCGCTCCCTTAGGAGAAAAGACAGATAGCTTCTTACCCGGGTTTGTACCGTACA  
332 CCACTGAGACCGCGGTGGTTGACCAGACAAACCAGAAAGTTCTGTAAAGTAACTGAACCCAATGTCGTTAGTGA

333 CGCTTACCTCTTAAGAGGTCACCTGACCTAACAGGATCCCACCACAATTGAGCAAATTTGTGAACATCATCACGTT  
334 ATCTTTCCCTGGTTGCCAATGGCCCATTTTCTGTGACGTAACGAGAAGGTCGCGAATTCAGGCGCTTTTTAGACT  
335 GGTCGTAANNNNNNNNNNNNNNNNNNNNNNNNNNNNNNNNNNATGCGAGTCTTCGCGGCCG  
336

337 **Supplementary Note 5: Sequence of CDS half-library.** The displayed sequence corresponds to the  
338 insert between PstI and NotI restriction sites (underlined) in pASPIre4. The BbsI restriction site for  
339 scarless cloning of 5'-UTR-CDS combinations is marked in orange. A graphical representation is  
340 available in **Supplementary Figure 5**.

341 CTGCAGGAAGACCCATGCGNGCNCNTNGTNGTNATHCGNCTNTCNCNGTGNACNGAYGCNACNACTAGTCCGGAAC  
342 GTCAGCTGGAAAGCTGTCAGCAGCTGTGTGCACAGCGTGGTTGGGATGTTGTTGGTGTGTCAGAGGATCTGGATG  
343 TTAGCGGTGCAGTTGATCCGTTTGGATCGTAAACGTCGTCCGAATCTGGCACGTTGGCTGGCATTGGAAGAACAGC  
344 CGTTTGATGTTATTGTTGCCTATCGTGTGATCGTCTGACCCGTAGCATTCGTCATCTGCAACAGCTGGTTCATT  
345 GGGCAGAAGATCATAAAAAACTGGTTGTGAGCGCAACCGAAGCACATTTTGATACCACCACCCCGTTTGCAGCAG  
346 TTGTTATTGCACTGATGGGCACCGTTGCACAGATGGAACCTGGAAGCAATTAAGAAGCGTAATCGTAGCGCAGCCC  
347 ATTTTAAACATTCGTGCAGGTAATATCGTGGTAGCCTGCCTCCGTGGGGTTATCTGCCGACGCGTGTAGATGGTG  
348 AATGGCGTCTGGTTCCTGACCCGGTTCAGCGTGAACGTATCTGGAAGTATATCATCGTGTGGTGGATAATCATG  
349 AACCGCTGCATCTGGTTGCACATGATCTGAATCGTGTGGTGTCTGAGTCCCAAAGATTATTTGCTCAGCTGC  
350 AAGGTGCGTAACCCGAGGGTCGTGAATGGTCTGCAACCGCATGAAACGTAGCATGATTAGCGAAGCAATGCTGG  
351 GTTATGCAACCCGTAATGGTAAAACCGTTCGTGATGATGATGTTGACCGCTGGTTCGTGCGAAGCAATGCTGA  
352 CACGTGAACAGCTGGAAGCACTGCGTGCCGAACCTGGTTAAAACCGCGTGCAAAACCGGCAGTTAGCACCCCGA  
353 GCCTGCTGCTGCGTGTCTGTTTTGTGTCAGTTTTGTGGTGAACCGGCATACAAAATTTGCCGGTGGTGGTTCGTAAC  
354 ATCCCGTTATCGTTGTGCTAGCATGGGTTTTCCGAAAACATTGTGGTAATGGTACAGTTGCAATGGCAGAATGGG  
355 ATGCATTTTGCAGAAGAACAGGTTCTGGATCTGCTGGGTGATGCCGAACGCTCGGAAAAGTTTGGGTTGCAGGTA  
356 GCGATAGCGCAGTTGAACTGGCCGAAGTTAATGCGGAACCTGGTCGATCTCACCAGTCTGATTGGAAGTCCCGCAT  
357 ATCGTGCGGGTAGTCTCAGCGTGAAGCACTGGATGCACGTATTGCAGCACTGGCAGCACGTCAAGAAGAAGTGG  
358 AAGGTCTGGAAGCACGTCAGCGGTTGGGAATGGCGTGAACAGGTCAGCGTTTTGGTATTGGTGGCGTGAGC  
359 AGGATACCGCAGCAAAAATAACCTGGCTGCGTAGTATGAATGTTGCGCTGACCTTTGATGTTGCGGTTGGCCTGA  
360 CCCGCACCATTGATTTTGGCGATCTGCAAGAATATGAACAGCATCTGCGTCTGGGTAGCGTTGTTGAACGCTGTC  
361 ATACCGGCATGAGCACCGGCGGTGGCAGCGGCGGTTCTGGTGGCTCTAGCAAAGGAGAAGAACTTTTCACTGGAG  
362 TTGTCCCAATTTCTGTTGAATTAGATGGTGTGTTAATGGGCACAAAATTTCTGTCCGTGGAGAGGGTGAAGGTG  
363 ATGCTACAAACGGAAAACCTCACCTTAAATTTATTTGCACTACTGGAAAACCTACCTGTTCCGTGGCCAACACTTG  
364 TCACTACTCTGACCTATGGTGTTCATGCTTTTCCCGTTATCCGGATCACATGAAACGGCATGACTTTTTTCAAGA  
365 GTGCCATGCCCCAAGGTTATGTACAGGAACGCACTATATCTTTCAAAGATGACGGGACCTACAAGACGCGTGCTG  
366 AAGTCAAGTTTGAAGGTGATACCCTTGTAAATCGTATCGAGTTAAAGGGTATTGATTTTAAAGAAGATGGAAACA  
367 TTCTTGGACACAACTCGAGTACAACCTTAACTCACACAATGTATACATCACGGCAGACAAAACAAAAGAAATGGAA  
368 TCAAAGCAACTTCAAATTCGCCACAACGTTGAAGATGGTTCCGTTCACTAGCAGACCATTATCAAACAAAATA  
369 CTCCAATTGGCGATGGCCCTGTCTTTTACCAGACAACCAATTACCTGTGACACAATCTGTCTTTTGCAAAAGATC  
370 CCAACGAAAAGCGTGACCACATGGTCTCTTGTAGTTTGTAACTGCTGCTGGGATTACACATGGCATGGATGAAC  
371 TCTACAAAAGGCCTGCTGCTAACGACGAAAACCTACGCTCTGGCTGCTTAATAAGCGGCCG  
372

373 **Supplementary Note 6: Sequence of ptRNA<sup>fMet</sup> variants.** The displayed sequence corresponds to  
374 the insert between KpnI and SpeI restriction sites (underlined) in pSEVA361. The mutated position 37  
375 in tRNA<sup>fMet</sup> is highlighted in bold. A graphical representation is available in **Supplementary Figure 6**.

376 GGTACCAAAATAACACCCTGCTTAATTAAGCGGATAACAATTTACACACAGGAGGCCGCCTAGGCCGCGGCCGCG  
377 CGAATTCGAGCTCGGTACCAAAATAACACCCTGCTTAATTAAGCGGATAACAATTTACACACAGGAGGCCGCCTAGGCCGCGGCCGCG  
378 ATTTTTATGCAAAATAAATGAGTTTTCATTTAATCATCTTTTATCGGAGACAGGAAGAGTTTAGTGTGTTTTTTG  
379 TAAAATAATGCGCTTAAGGGAGAGCAGGAGAAGGCAAAAGTATTTCAACAAATGAAAGTGAACCTGGATATTCATTC  
380 ACATGATTAGCAATAAACGTTGACAAAATGTGGCGTGGATCACTATAATGCCTGCAGATTTTACGTCCCGTCTCG  
381 GTACACCAATCCCAGCAGTATTTGCATTTTTTACCAAAACGAGTAGAATTTGCCACGTTTCAGGCGCGGGGTG  
382 GAGCAGCCTGGTAGCTCGTGGGCTCAT**N**ACCCGAAGGTCGTGCGTTCAAATCCGGCCCCCGCAACCACTTTCCC  
383 TTAGAGTCCTTTTTCAAATATACTGTGAAGACTTCGGCCTTCGTAGTGGGATTTGAAAAATCCTTCTGGAAAGT  
384 GCTCCAGACCGCAGTTGCGGTTATAGGGTTCAGTTATATAAAGCCCCGATTTATCGGGTTTTTTGTTATCTGAC  
385 TACAGAATAACTGGGCTTTAGGCCCTTTTTTTATGTCTGGGGTGGGCACTAGT  
386

387

388 **References (Supplementary Information)**

- 389 1. Hollerer, S., Papaxanthos, L., Gumpinger, A.C., Fischer, K., Beisel, C., Borgwardt, K.,  
390 Benenson, Y. and Jeschek, M. (2020) Large-scale DNA-based phenotypic recording and deep  
391 learning enable highly accurate sequence-function mapping. *Nat Commun*, **11**, 3551.
- 392 2. Silva-Rocha, R., Martinez-Garcia, E., Calles, B., Chavarria, M., Arce-Rodriguez, A., de Las  
393 Heras, A., Paez-Espino, A.D., Durante-Rodriguez, G., Kim, J., Nickel, P.I. *et al.* (2013) The  
394 Standard European Vector Architecture (SEVA): a coherent platform for the analysis and  
395 deployment of complex prokaryotic phenotypes. *Nucleic Acids Res*, **41**, D666-675.
- 396 3. Sharp, P.M. and Li, W.H. (1987) The codon Adaptation Index--a measure of directional  
397 synonymous codon usage bias, and its potential applications. *Nucleic Acids Res*, **15**, 1281-  
398 1295.
- 399 4. dos Reis, M., Wernisch, L. and Savva, R. (2003) Unexpected correlations between gene  
400 expression and codon usage bias from microarray data for the whole Escherichia coli K-12  
401 genome. *Nucleic Acids Res*, **31**, 6976-6985.
- 402
